# Supplementary material
Source: PubMed Central journal article supplement (PMC3229100)

Supporting Information for:

**Silver-Mediated Trifluoromethylation of Arenes using TMSF<sub>3</sub>**

Yingda Ye, Shin Hee Lee, and Melanie S. Sanford\*

*Department of Chemistry, University of Michigan, 930 North University Avenue, Ann Arbor,  
Michigan 48109*

**General Procedures**

NMR spectra were obtained on a Varian Inova 400 (399.96 MHz for <sup>1</sup>H; 376.34 MHz for <sup>19</sup>F; 100.57 MHz for <sup>13</sup>C) or a MR400 (400.53 MHz for <sup>1</sup>H; 376.87 MHz for <sup>19</sup>F; 100.71 MHz for <sup>13</sup>C) spectrometer. <sup>1</sup>H and <sup>13</sup>C chemical shifts are reported in parts per million (ppm) relative to TMS, with the residual solvent peak used as an internal reference. <sup>19</sup>F NMR spectra are referenced based on the internal standard 4-fluoroanisole, which appears at –125.00 ppm. <sup>1</sup>H and <sup>19</sup>F multiplicities are reported as follows: singlet (s), doublet (d), quartet (q) and multiplet (m).

**Materials and Methods**

AgF, AgOTf, and 4-fluoroanisole were obtained from Matrix Scientific. Benzene and potassium fluoride were obtained from EMD. Rupert's reagent (TMSF<sub>3</sub>) was obtained from Oakwood Products. AgNO<sub>3</sub>, 1,2-Dimethoxybenzene, 1,3-dimethoxybenzene, 1,4-dichlorobenzene, anisole, iodobenzene, and naphthalene were obtained from Sigma Aldrich. 1,4-Dimethoxybenzene and *o*-xylenes were obtained from TCI America. Trifluorotoluene and *m*-xylenes were obtained from Acros. 1,2-Dichloroethane, *p*-xylene, thiophene, *N*-methylpyrrole and mesitylene were obtained from Alfa Aesar. CDCl<sub>3</sub> was obtained from Cambridge Isotope Laboratories. Authentic samples of the aryl–CF<sub>3</sub> products were purchased from commercial sources unless otherwise stated. Dichloroethane, xylenes, and dimethoxybenzene derivatives were distilled from CaH<sub>2</sub>. Benzene was distilled from Na and benzophenone. Anisole, *N*-methylpyrrole, mesitylene, and thiophene were distilled from Na. Other chemicals were used as received. All syntheses were conducted using standard Schlenk techniques or in a nitrogen atmosphere glovebox unless otherwise stated.

## Experimental Details

### Reaction of Ag–CF<sub>3</sub> with PhI

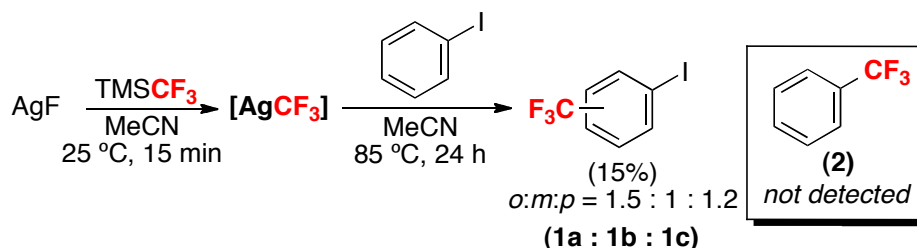

In a glovebox, AgF (10.3 mg, 0.081 mmol, 1 equiv) was weighed into a 4 mL vial and dissolved in MeCN (0.2 mL). TMSCF<sub>3</sub> (12  $\mu$ L, 0.081 mmol, 1 equiv) was added, and the reaction was stirred at 25 °C for 15 min.<sup>1</sup> Iodobenzene (180  $\mu$ L, 1.62 mmol, 20 equiv) was added to the reaction mixture. The vial was sealed with a Teflon-lined cap and removed from the glovebox. The reaction was heated at 85 °C for 24 h with exclusion of light. The resulting dark brown mixture was cooled to room temperature and diluted with MeCN (1 mL). 4-Fluoroanisole (1 equiv) was added as an internal standard, and the reaction was analyzed by <sup>19</sup>F NMR spectroscopy in MeCN, showing a combined 15% yield of the three isomeric products. The <sup>19</sup>F NMR spectroscopic data matched that of authentic samples of all three isomers (*o*-isomer (Alfa Aesar): s, –62.7 ppm; *m*-isomer (Matrix Scientific): s, –62.9 ppm; *p*-isomer (Matrix Scientific), s, –63.0 ppm).

### Reaction of Ag–CF<sub>3</sub> with Benzene

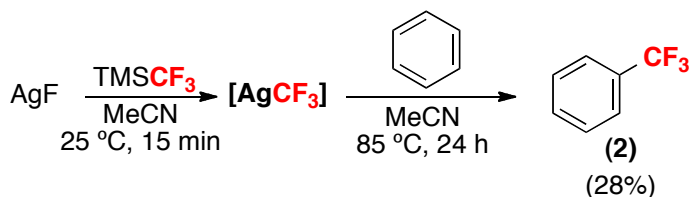

In a glovebox, AgF (10.3 mg, 0.081 mmol, 1 equiv) was weighed into a 4 mL vial and dissolved in MeCN (0.2 mL). TMSCF<sub>3</sub> (12  $\mu$ L, 0.081 mmol, 1 equiv) was added, and the reaction was stirred at 25 °C for 15 min.<sup>1</sup> Benzene (144  $\mu$ L, 1.62 mmol, 20 equiv) was added to the reaction mixture. The vial was sealed with a Teflon-lined cap and removed from the glovebox. The reaction was heated at 85 °C for 24 h with exclusion of light. The resulting dark brown mixture was cooled to room temperature and diluted with MeCN (1 mL). 4-Fluoroanisole (1 equiv) was added as an internal standard, and the reaction was analyzed by <sup>19</sup>F NMR spectroscopy in

MeCN, showing 28% yield of trifluorotoluene. The  $^{19}\text{F}$  NMR spectroscopic data matched that obtained of an authentic sample of trifluorotoluene (Acros, s,  $-63.3$  ppm).

### Trifluoromethylation of C<sub>6</sub>H<sub>6</sub> Reaction Optimization (Variation of Equiv of AgOTf/KF)

In a glovebox, AgOTf (1-4 equiv, 0.081-0.324 mmol) and KF (1-4 equiv, 0.081-0.324 mmol) were weighed into a 4 mL vial and dissolved in DCE (0.2 mL). Benzene (144  $\mu$ L, 1.62 mmol, 20 equiv) and TMSCF<sub>3</sub> (12  $\mu$ L, 0.081 mmol, 1 equiv) were added. The vial was sealed with a Teflon-lined cap and removed from the glovebox. The reaction was heated at 85 °C for 24 h with exclusion of light. The resulting dark brown mixture was cooled to room temperature and diluted with DCE (1 mL). 4-Fluoroanisole (1 equiv) was added as an internal standard, and the reaction was analyzed by <sup>19</sup>F NMR spectroscopy in DCE. In all cases, <sup>19</sup>F NMR spectroscopic data matched that obtained for an authentic sample of trifluorotoluene in DCE. The results of these experiments are reported in **Table S1**.

**Table S1.** Trifluoromethylation of C<sub>6</sub>H<sub>6</sub> with Different Equivalent of AgOTf/KF

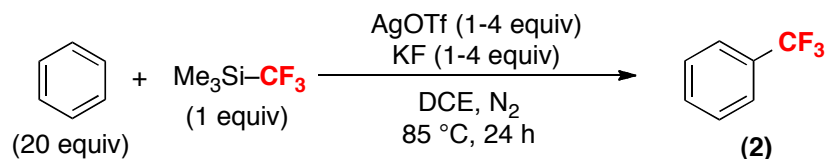

| entry | AgOTf/KF (equiv) | Yield (%) |
|-------|------------------|-----------|
| 1     | 1                | 22        |
| 2     | 2                | 68        |
| 3     | 3                | 74        |
| 4     | 4                | 87        |

### Trifluoromethylation of C<sub>6</sub>H<sub>6</sub> Reaction Optimization (Variation of Equiv of Benzene)

In a glovebox, AgOTf (83.2 mg, 0.324 mmol, 4 equiv) and KF (18.8 mg, 0.324 mmol, 4 equiv) were weighed into a 4 mL vial and dissolved in DCE (0.2 mL). Benzene and TMSCF<sub>3</sub> (12  $\mu$ L, 0.081 mmol, 1 equiv) were added. The vial was sealed with a Teflon-lined cap and removed from the glovebox. The reaction was heated at 85 °C for 24 h with exclusion of light. The resulting dark brown mixture was cooled to room temperature and diluted with DCE (1 mL). 4-Fluoroanisole (1 equiv) was added as an internal standard, and the reaction was analyzed by <sup>19</sup>F NMR spectroscopy in DCE. The <sup>19</sup>F NMR spectroscopic data matched that obtained for an authentic sample of trifluorotoluene in DCE. The results of these experiments are reported in **Table S2**.

**Table S2.** Trifluoromethylation of C<sub>6</sub>H<sub>6</sub> with Different Equivalents of C<sub>6</sub>H<sub>6</sub>

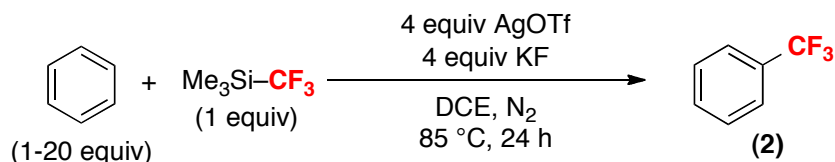

| Entry | C <sub>6</sub> H <sub>6</sub> (equiv) | Yield (%) |
|-------|---------------------------------------|-----------|
| 1     | 1                                     | 17        |
| 2     | 5                                     | 49        |
| 3     | 10                                    | 75        |
| 4     | 20                                    | 87        |

This reaction was also conducted using benzene as the limiting reagent (12  $\mu$ L, 0.081 mmol, 1 equiv) and an excess of TMSCF<sub>3</sub> (60  $\mu$ L, 0.4 mmol, 5 equiv). Under these conditions, the yield of the reaction was 53%.

### Trifluoromethylation of C<sub>6</sub>H<sub>6</sub> Reaction Optimization (Variation of Solvent)

In a glovebox, AgOTf (83.2 mg, 0.324 mmol, 4 equiv) and KF (18.8 mg, 0.324 mmol, 4 equiv) were weighed into a 4 mL vial and dissolved in the appropriate solvent (0.2 mL). Benzene (72  $\mu$ L, 0.81 mmol, 10 equiv) and TMSCF<sub>3</sub> (12  $\mu$ L, 0.081 mmol, 1 equiv) were added. The vial was sealed with a Teflon-lined cap and removed from the glovebox. The reaction was heated at 85 °C for 24 h with exclusion of light. The resulting dark brown mixture was cooled to room temperature and diluted with DCE (1 mL). 4-Fluoroanisole (1 equiv) was added as an internal standard, and the reaction was analyzed by <sup>19</sup>F NMR spectroscopy. The <sup>19</sup>F NMR spectroscopic data matched that obtained for an authentic sample of trifluorotoluene. The results of these experiments are reported in **Table S3**.

**Table S3.** Trifluoromethylation of C<sub>6</sub>H<sub>6</sub> with Different Solvents

| 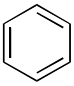 | +                 | 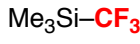 | $\xrightarrow[85\text{ }^{\circ}\text{C}, 24\text{ h, N}_2]{4\text{ equiv AgOTf}, 4\text{ equiv KF}}$ | 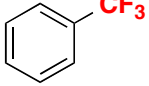 |
|-----------------------------------------------------------------------------------|-------------------|-----------------------------------------------------------------------------------|-------------------------------------------------------------------------------------------------------|-------------------------------------------------------------------------------------|
| 10 equiv                                                                          |                   | 1 equiv                                                                           |                                                                                                       | (2)                                                                                 |
| entry                                                                             | solvent           | yield (%)                                                                         |                                                                                                       |                                                                                     |
| 1                                                                                 | diglyme           | 3                                                                                 |                                                                                                       |                                                                                     |
| 2                                                                                 | pentane           | 4                                                                                 |                                                                                                       |                                                                                     |
| 3                                                                                 | NMP               | 7                                                                                 |                                                                                                       |                                                                                     |
| 4                                                                                 | DMA               | 10                                                                                |                                                                                                       |                                                                                     |
| 5                                                                                 | MeCN              | 20                                                                                |                                                                                                       |                                                                                     |
| 6                                                                                 | THF               | 27                                                                                |                                                                                                       |                                                                                     |
| 7                                                                                 | Et <sub>2</sub> O | 35                                                                                |                                                                                                       |                                                                                     |
| 8                                                                                 | dioxane           | 48                                                                                |                                                                                                       |                                                                                     |
| 9                                                                                 | ethyl acetate     | 57                                                                                |                                                                                                       |                                                                                     |
| 10                                                                                | DCE               | 75                                                                                |                                                                                                       |                                                                                     |

## General Procedure for Preparation of Authentic Samples of Previously Unreported

### Benzotrifluorides

The authentic samples were synthesized following a literature procedure.<sup>2</sup> In a glovebox,  $[\text{Cu}(\text{OTf})]_2 \cdot \text{C}_6\text{H}_6$  (60.4 mg, 0.12 mmol, 0.6 equiv), 1,10-phenanthroline (43 mg, 0.24 mmol, 1.2 equiv),  $\text{K}_3\text{PO}_4$  (127 mg, 0.6 mmol, 3 equiv), KF (58.1 mg, 1.0 mmol, 5 equiv),  $\text{Ag}_2\text{CO}_3$  (55.2 mg, 0.2 mmol, 1 equiv), DMF (2.0 mL) and  $\text{TMSCF}_3$  (0.15 mL, 0.1 mmol, 5 equiv) were added to a 20 mL reaction vial that was equipped with a stir bar. In a second vial, boronic acid (0.2 mmol, 1 equiv) was dissolved in DMF (2.0 mL). Both vials were sealed with rubber septa and removed from the glovebox. The first vial was heated to 45 °C, and the solution of boronic acid was then added to over 2 h by using a syringe pump under  $\text{N}_2$  atmosphere. After addition of the boronic acid solution, the reaction mixture was heated at 45 °C for another 2 h. The reaction was cooled to 0 °C, and water (10 mL) was added. The resulting mixture was extracted with diethyl ether, and the combined organic extracts were washed with water (3 x 50 mL) and brine (1 x 50 mL) and then dried over magnesium sulfate. The solvent was removed by rotary evaporation, and the products were purified by column chromatography on silica gel using pentane as the eluent.

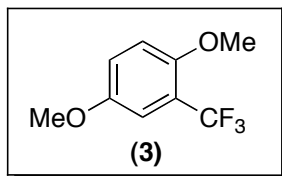

#### 1,4-Dimethoxy-2-(trifluoromethyl)benzene

The general procedure was followed using 2,5-dimethoxyphenylboronic acid (36.4 mg, 0.2 mmol, 1 equiv) as the substrate. The product was obtained as colorless liquid ( $R_F$  = 0.13 in pentanes).  $^1\text{H}$  NMR ( $\text{CDCl}_3$ , 25 °C):  $\delta$  7.12 (s, 1H), 7.02 (d,  $J$  = 9.2 Hz, 1H), 6.94 (d,  $J$  = 9.2 Hz, 1H), 3.86 (s, 3H), 3.79 (s, 3H).  $^{13}\text{C}$  NMR ( $\text{CDCl}_3$ , 25 °C):  $\delta$  153.10, 151.67, 123.56 (q,  $J$  = 271.0 Hz), 119.54 (q,  $J$  = 30.8 Hz), 118.23, 113.72, 112.96 (q,  $J$  = 5.5 Hz), 56.71, 56.03.  $^{19}\text{F}$  NMR ( $\text{CDCl}_3$ , 25 °C):  $\delta$  -62.44 (s, 3F). HRMS EI ( $m/z$ ):  $[\text{M}]^+$  calcd for  $\text{C}_9\text{H}_9\text{F}_3\text{O}_2$ , 206.0555; found, 206.0563.

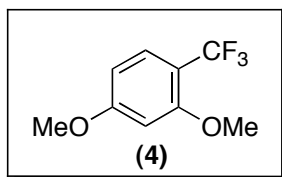

#### 1,3-Dimethoxy-4-(trifluoromethyl)benzene

The general procedure was followed using 2,4-dimethoxyphenylboronic acid (36.4 mg, 0.2 mmol, 1 equiv) as the substrate. The product was obtained as colorless liquid ( $R_F$  = 0.1 in pentanes).  $^1\text{H}$  NMR ( $\text{CDCl}_3$ , 25 °C):  $\delta$  7.48 (d,  $J$  = 8.7 Hz, 1H), 6.52 (s, 1H), 6.49 (d,  $J$  = 8.7 Hz, 1H), 3.87 (s, 3H), 3.84 (s, 3H).  $^{13}\text{C}$  NMR ( $\text{CDCl}_3$ , 25 °C):  $\delta$  163.80, 159.01, 128.41 (q,  $J$  = 5.4 Hz), 124.12 (q,  $J$  = 270.6 Hz), 111.70 (q,  $J$  = 31.1 Hz), 103.84, 99.51, 55.96, 55.65.  $^{19}\text{F}$  NMR ( $\text{CDCl}_3$ , 25 °C):  $\delta$  -61.32 (s, 3F). HRMS EI ( $m/z$ ):  $[\text{M}]^+$  calcd for  $\text{C}_9\text{H}_9\text{F}_3\text{O}_2$ , 206.0555; found, 206.0559.

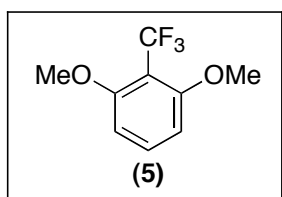

#### 1,3-Dimethoxy-2-(trifluoromethyl)benzene

The general procedure was followed using 2,6-dimethoxyphenylboronic acid (36.4 mg, 0.2 mmol, 1 equiv) as the substrate. The product was obtained as a light yellow viscous solid ( $R_F$  = 0.13 in pentanes).  $^1\text{H}$  NMR ( $\text{CDCl}_3$ , 25 °C):  $\delta$  7.38 (t,  $J$  = 8.8 Hz, 1H), 6.61 (d,  $J$  = 8.8 Hz, 2H), 3.86 (s, 6H).  $^{13}\text{C}$  NMR ( $\text{CDCl}_3$ , 25 °C):  $\delta$  159.44, 133.11, 127.30, 124.22 (q,  $J$  = 275.5 Hz), 104.96, 56.50.  $^{19}\text{F}$  NMR ( $\text{CDCl}_3$ , 25 °C):  $\delta$  -54.97 (s, 3F). HRMS EI ( $m/z$ ):  $[\text{M}]^+$  calcd for  $\text{C}_9\text{H}_9\text{F}_3\text{O}_2$ , 206.0555; found, 206.0555.

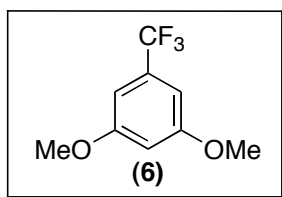

#### 1,3-Dimethoxy-5-(trifluoromethyl)benzene

The general procedure was followed using 3,5-dimethoxyphenylboronic acid (36.4 mg, 0.2 mmol, 1 equiv) as the substrate. The product was obtained as colorless liquid ( $R_F$  = 0.23 in pentanes).  $^1\text{H}$  NMR ( $\text{CDCl}_3$ , 25 °C):  $\delta$  6.74 (s, 2H), 6.60 (s, 1H), 3.82 (s, 6H).  $^{13}\text{C}$  NMR ( $\text{CDCl}_3$ , 25 °C):  $\delta$  161.16, 132.53 (q,  $J$  = 32.3 Hz), 124.05 (q,  $J$  = 272.3 Hz), 103.76, 103.42 (q,  $J$  = 3.9 Hz), 55.67.  $^{19}\text{F}$  NMR ( $\text{CDCl}_3$ , 25 °C):  $\delta$  -62.96 (s, 3F). HRMS EI ( $m/z$ ):  $[\text{M}]^+$  calcd for  $\text{C}_9\text{H}_9\text{F}_3\text{O}_2$ , 206.0555; found, 206.0554.

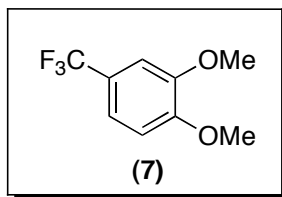

#### 1,2-Dimethoxy-4-(trifluoromethyl)benzene

The general procedure was followed using 3,4-dimethoxyphenylboronic acid (36.4 mg, 0.2 mmol, 1 equiv) as the substrate. The product was obtained as colorless liquid ( $R_F$  = 0.1 in pentanes).  $^1\text{H}$  NMR ( $\text{CDCl}_3$ , 25 °C):  $\delta$  7.18 (d,  $J$  = 8.4 Hz, 1H), 7.05 (s, 1H), 6.88 (d,  $J$  = 8.4 Hz, 1H), 3.89 (s, 6H).  $^{13}\text{C}$  NMR ( $\text{CDCl}_3$ , 25 °C):  $\delta$  151.66, 149.12, 124.40 (q,  $J$  = 271.5 Hz), 122.97 (q,  $J$  = 32.9 Hz), 118.40 (q,  $J$  = 3.6 Hz), 110.65, 108.06 (q,  $J$  = 3.6 Hz), 56.04, 56.02.  $^{19}\text{F}$  NMR ( $\text{CDCl}_3$ , 25 °C):  $\delta$  -61.67 (s, 3F). HRMS EI ( $m/z$ ):  $[\text{M}]^+$  calcd for  $\text{C}_9\text{H}_9\text{F}_3\text{O}_2$ , 206.0555; found, 206.0559.

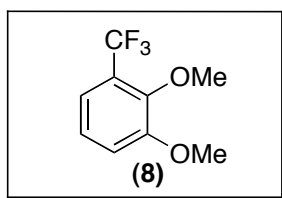

#### 1,2-Dimethoxy-3-(trifluoromethyl)benzene

The general procedure was followed using 2,3-dimethoxyphenylboronic acid (36.4 mg, 0.2 mmol, 1 equiv) as the substrate. The product was obtained as colorless liquid ( $R_F$  = 0.12 in pentanes).  $^1\text{H}$  NMR ( $\text{CDCl}_3$ , 25 °C):  $\delta$  7.17-7.08 (multiple peaks, 3H), 3.91 (s, 3H), 3.90 (s, 3H).  $^{13}\text{C}$  NMR ( $\text{CDCl}_3$ , 25 °C):  $\delta$  153.62, 147.72 (q,  $J$  = 1.9 Hz), 124.72 (q,  $J$  = 30.4 Hz), 123.92, 123.68 (q,  $J$  = 273.6 Hz), 118.16 (q,  $J$  = 5.1 Hz), 116.24, 61.50, 56.15.  $^{19}\text{F}$  NMR ( $\text{CDCl}_3$ , 25 °C):  $\delta$  -61.36 (s, 3F). HRMS EI ( $m/z$ ):  $[\text{M}]^+$  calcd for  $\text{C}_9\text{H}_9\text{F}_3\text{O}_2$ , 206.0555; found, 206.0559.

### General Procedure for Trifluoromethylation of Arenes

In a glovebox, AgOTf (83.2 mg, 0.324 mmol, 4 equiv) and KF (18.8 mg, 0.324 mmol, 4 equiv) were weighed into a 4 mL vial and dissolved in DCE (0.2 mL). The aromatic substrate and TMSCF<sub>3</sub> (12 µL, 0.081 mmol, 1 equiv) were then added. The vial was sealed with a Teflon-lined cap and removed from the glovebox. The reaction was heated at 85 °C for 24 h with exclusion of light. The resulting dark brown mixture was cooled to room temperature and diluted with DCE (1 mL). 4-Fluoroanisole (1 equiv) was added as an internal standard, and the reaction was analyzed by <sup>19</sup>F NMR spectroscopy in DCE to determine the yield. GCMS analyses were performed on a Shimadzu GCMS-QP5000 gas chromatograph mass spectrometer. The products were separated on a 30 m length×0.25 mm i.d., RESTEK XTl-5 column coated with a 0.25 µm film. The GC oven temperature program was as follows: 30 °C hold 10 min, ramp 20 °C/min to 250 °C, and hold for 3 min. Helium was employed as the carrier gas, with a constant column flow of 1.5 mL/min. The injector temperature was held constant at 250 °C.

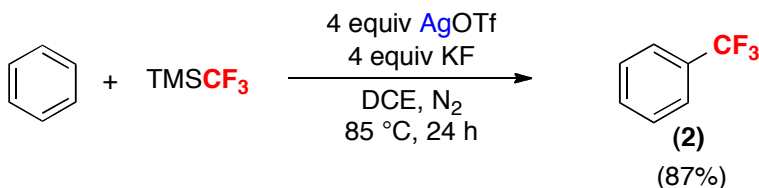

The general procedure was followed using 20 equiv of benzene. The <sup>19</sup>F NMR spectroscopic data matched that obtained for an authentic sample of trifluorotoluene (Acros, s, −63.3 ppm). Trifluorotoluene was formed in 87% yield as determined by <sup>19</sup>F NMR spectroscopic analysis of the crude reaction mixture.

This reaction was also conducted on 0.5 mmol and 1 mmol scale. For the 0.5 mmol scale reaction, AgOTf (514 mg, 2 mmol, 4 equiv), KF (116 mg, 2 mmol, 4 equiv), TMSCF<sub>3</sub> (73.8 µL, 0.5 mmol, 1 equiv), benzene (0.89 mL, 10 mmol, 20 equiv) and DCE (1.25 mL) were used. The yield of the reaction was 84%. For the 1 mmol scale reaction, AgOTf (1028 mg, 4 mmol, 4 equiv), KF (232 mg, 4 mmol, 4 equiv), TMSCF<sub>3</sub> (147.7 µL, 1 mmol, 1 equiv), benzene (1.78 mL, 20 mmol, 20 equiv) and DCE (2.5 mL) were used. The reaction was conducted in a 20 mL vial, and the yield was 87%.

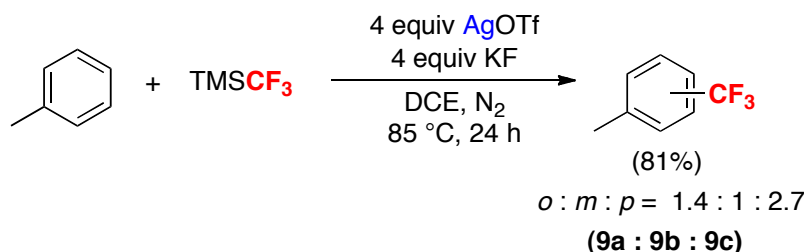

The general procedure was followed using 10 equiv of toluene. The  $^{19}\text{F}$  NMR spectroscopic data matched that of authentic samples of all three isomers (*o*-isomer, (Matrix Scientific): s, –62.7 ppm; *m*-isomer (Matrix Scientific): s, –62.4 ppm; *p*-isomer (Alfa Aesar), s, –61.7 ppm). The trifluoromethylated products were formed in 81% combined yield with an *o* : *m* : *p* ratio of 1.4 : 1 : 2.7 as determined by  $^{19}\text{F}$  NMR spectroscopic analysis of the crude reaction mixture.

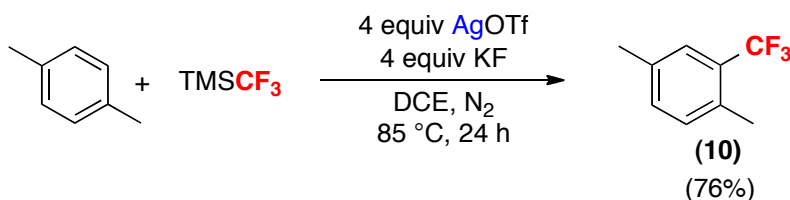

The general procedure was followed using 10 equiv of *p*-xylenes.  $^{19}\text{F}$  NMR analysis of the crude reaction mixture showed that 1,4-dimethyl-2-(trifluoromethyl)benzene was formed in 76% yield. The product showed a  $^{19}\text{F}$  NMR signal at –61.6 ppm in DCE (lit. –61.6 ppm in  $\text{CDCl}_3$ ).<sup>3</sup> The identity of the product was further confirmed by GCMS analysis, where the product peak was observed at 11.8 min. The mass spectrum of the product is provided in the spectral data below.

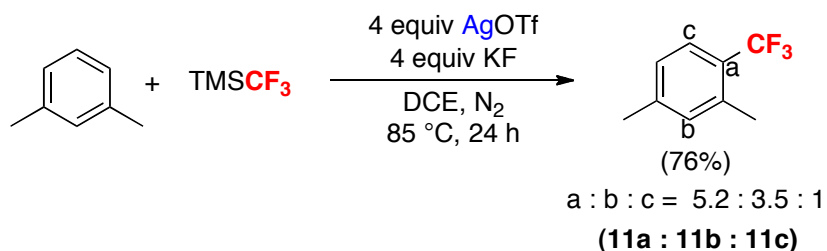

The general procedure was followed using 10 equiv of *m*-xylenes.  $^{19}\text{F}$  NMR analysis of the crude reaction mixture showed that the mono-trifluoromethylated product was formed in 76% yield as a mixture of 3 isomers. These products showed  $^{19}\text{F}$  NMR signals in DCE at –61.2 ppm (a isomer, lit. –61.2 ppm in  $\text{CDCl}_3$ ),<sup>3</sup> –54.1 ppm (b isomer, lit. –54.1 ppm in  $\text{CDCl}_3$ ),<sup>3</sup> and –62.6 ppm (c isomer, lit. –62.6 ppm in  $\text{CDCl}_3$ ).<sup>3</sup> The identity of the products was further confirmed by

GCMS analysis, where the product peaks were observed at 11.6 min, 11.9 min and 12.2 min. The mass spectra of the products are provided in the spectral data below.

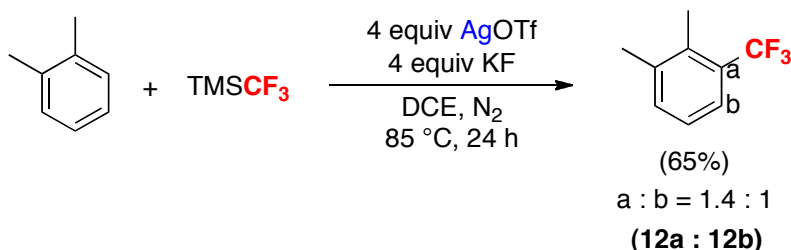

The general procedure was followed using 10 equiv of *ortho*-xylenes.  $^{19}\text{F}$  NMR analysis of the crude reaction mixture showed that the mono-trifluoromethylated product was formed in 65% yield as a 1.4 : 1 mixture of the a and b isomers. These products showed  $^{19}\text{F}$  NMR signals in DCE at  $-60.4$  ppm (a isomer, lit.  $-60.4$  ppm in  $\text{CDCl}_3$ )<sup>3</sup> and  $-62.3$  ppm (b isomer). The  $^{19}\text{F}$  NMR spectroscopic data of b isomer matched that of an authentic sample (SynQuest Laboratories). The identity of the products was further confirmed by GCMS analysis, where the product peaks were observed at 12.3 min and 12.4 min. The mass spectra of the products are provided in the spectral data below.

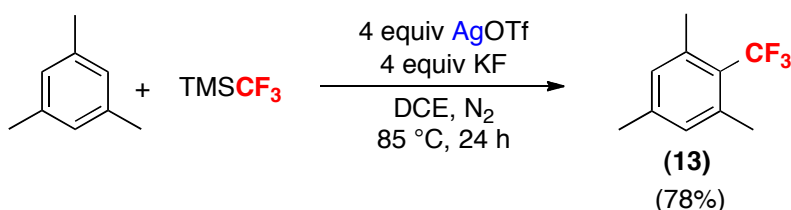

The general procedure was followed using 10 equiv of mesitylene.  $^{19}\text{F}$  NMR analysis of the crude reaction mixture showed that 1,3,5-trimethyl-2-(trifluoromethyl)benzene was formed in 78% yield. The product showed a  $^{19}\text{F}$  NMR signal at  $-53.7$  ppm in DCE (lit.  $-55$  ppm in  $\text{CDCl}_3$ ).<sup>4</sup> The identity of the product was further confirmed by GCMS analysis, where the product peak was observed at 14.0 min. The mass spectrum of the product is provided in the spectral data below.

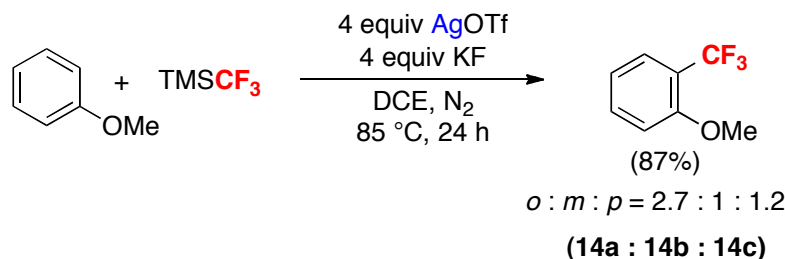

The general procedure was followed using 10 equiv of anisole. The  $^{19}\text{F}$  NMR spectroscopic data matched that of authentic samples of all three isomers (*o*-isomer (Alfa Aesar): s,  $-62.5$  ppm; *m*-isomer (Matrix Scientific): s,  $-62.8$  ppm; *p*-isomer (SynQuest Laboratories), s,  $-61.5$  ppm). The trifluoromethylated products were formed in 87% combined yield with an *o* : *m* : *p* ratio of 2.7 : 1 : 1.2 as determined by  $^{19}\text{F}$  NMR spectroscopic analysis of the crude reaction mixture.

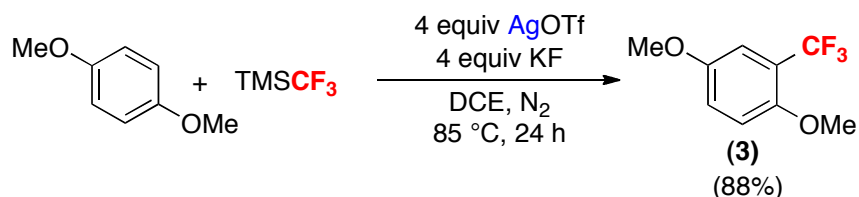

The general procedure was followed using 20 equiv of 1,4-dimethoxybenzene. The  $^{19}\text{F}$  NMR spectroscopic data matched that of the authentic samples of prepared above. 1,4-Dimethoxy-2-trifluoromethylbenzene was formed in 81% yield as determined by  $^{19}\text{F}$  NMR spectroscopic analysis of the crude reaction mixture.

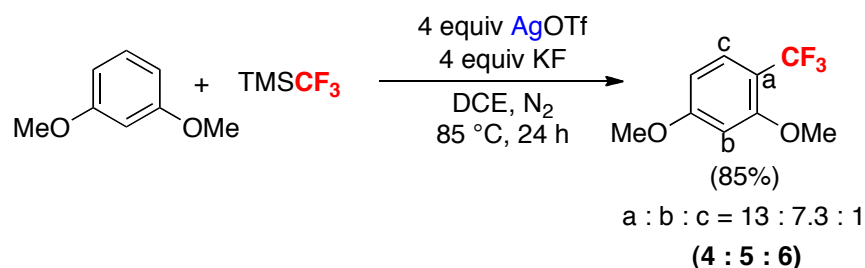

The general procedure was followed using 10 equiv of 1,3-dimethoxybenzene. The  $^{19}\text{F}$  NMR spectroscopic data matched that of the authentic samples of prepared above. The three isomeric mono-trifluoromethylated products were formed in 85% yield with an *a* : *b* : *c* ratio of 13 : 7.3 : 1 as determined by  $^{19}\text{F}$  NMR spectroscopic analysis of the crude reaction mixture.

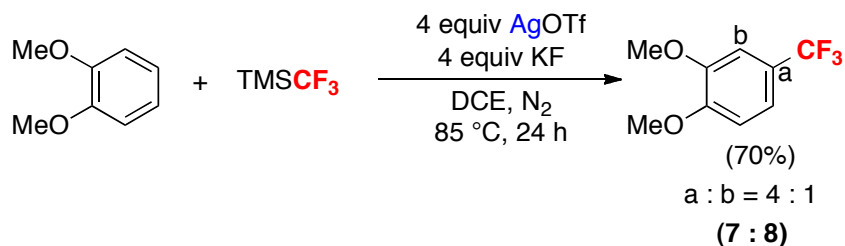

The general procedure was followed using 10 equiv of 1,2-dimethoxybenzene. The  $^{19}\text{F}$  NMR spectroscopic data matched that of the authentic samples of prepared above. The three isomeric mono-trifluoromethylated products were formed in 71% yield with an a : b ratio of 4 : 1 as determined by  $^{19}\text{F}$  NMR spectroscopic analysis of the crude reaction mixture.

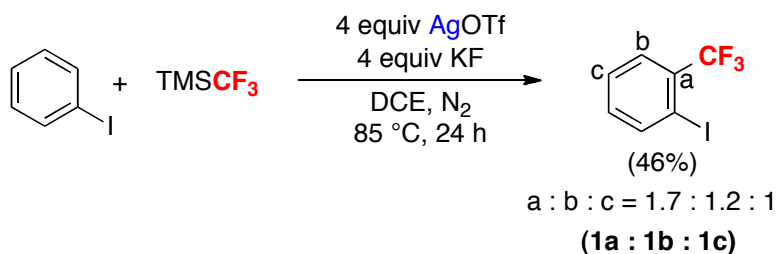

The general procedure was followed using 20 equiv of iodobenzene. The  $^{19}\text{F}$  NMR spectroscopic data matched that of authentic samples of all three isomers (*o*-isomer (Alfa Aesar): s,  $-62.7$  ppm; *m*-isomer (Matrix Scientific): s,  $-62.9$  ppm; *p*-isomer (Matrix Scientific), s,  $-63.0$  ppm). The trifluoromethylated products were obtained in 46% combined yield with an *o* : *m* : *p* ratio of 1.7 : 1.2 : 1 as determined by  $^{19}\text{F}$  NMR analysis of the crude reaction mixture.

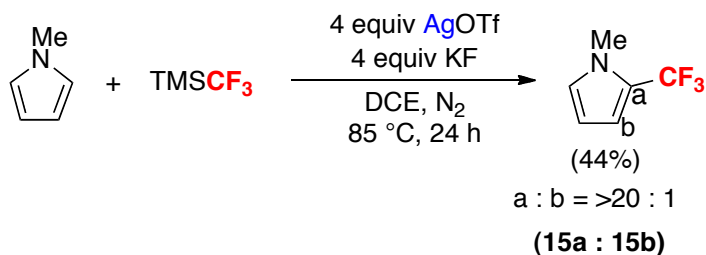

The general procedure was followed using 20 equiv of *N*-methylpyrrole.  $^{19}\text{F}$  NMR analysis of the crude reaction mixture showed that the mono-trifluoromethylated product was formed in 44% total yield as a >20:1 mixture of the a and b isomers. These products showed  $^{19}\text{F}$  NMR signals in DCE at  $-58.8$  ppm (a isomer, lit.  $-58.3$  ppm in  $\text{CDCl}_3$ )<sup>5</sup> and  $-56.8$  ppm (b isomer, lit.  $-56.6$  in  $\text{CDCl}_3$ ).<sup>5</sup> The identity of the products was further confirmed by GCMS analysis, where the

product peaks were observed at 3.7 min and 4.1 min. The mass spectra of the products are provided in the spectral data below.

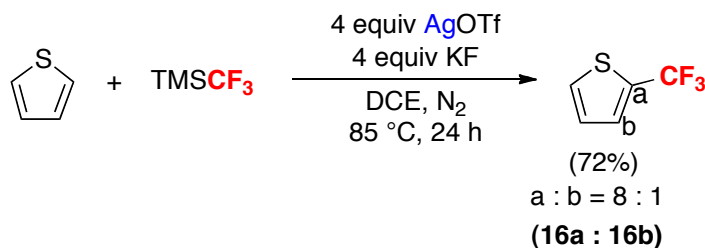

The general procedure was followed using 10 equiv of thiophene.  $^{19}\text{F}$  NMR analysis of the crude reaction mixture showed that the mono-trifluoromethylated product was formed in 72% total yield as an 8:1 mixture of the a and b isomers. These products showed  $^{19}\text{F}$  NMR signals in DCE at  $-55.1$  ppm (a isomer, lit.  $-55.1$  ppm in thiophene)<sup>6</sup> and  $-59.4$  ppm (b isomer, lit.  $-59.5$  in thiophene).<sup>6</sup> The identity of the products was further confirmed by GCMS analysis, where the product peaks were observed at 3.3 min and 3.5 min. The mass spectra of the products are provided in the spectral data below.

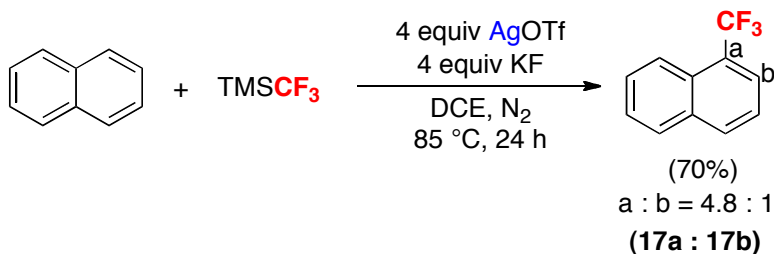

The general procedure was followed using 5 equiv of naphthalene.  $^{19}\text{F}$  NMR analysis of the crude reaction mixture showed that the mono-trifluoromethylated product was formed in 70% total yield as an 4.8 : 1 mixture of the a and b isomers. These products showed  $^{19}\text{F}$  NMR signals in DCE at  $-59.9$  ppm (a isomer, lit.  $-60.1$  ppm in  $\text{CDCl}_3$ )<sup>7</sup> and  $-62.4$  ppm (b isomer, lit.  $-62.1$  in  $\text{CDCl}_3$ ).<sup>2</sup> The identity of the products was further confirmed by GCMS analysis, where the product peaks were observed at 15.7 min and 15.8 min. The mass spectra of the products are provided in the spectral data below.

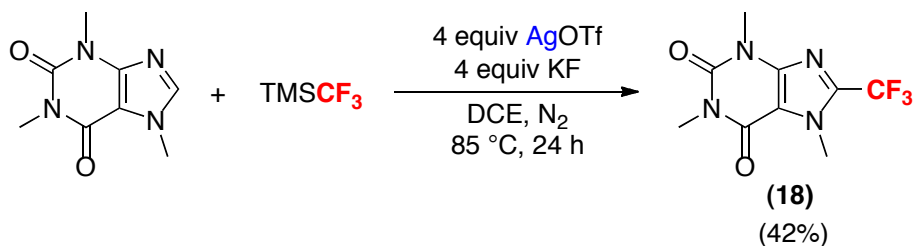

The general procedure was followed using 5 equiv of caffeine.  $^{19}\text{F}$  NMR analysis of the crude reaction mixture showed that the trifluoromethylated product was formed in 42% yield. The product showed  $^{19}\text{F}$  NMR signals in DCE at  $-62.5$  ppm (lit.  $-62.7$  ppm in  $\text{CDCl}_3$ ).<sup>8</sup> The identity of the product was further confirmed by GCMS analysis. The GC oven temperature program was as follows: start at  $100^\circ\text{C}$ , ramp  $15^\circ\text{C}/\text{min}$  to  $250^\circ\text{C}$ , and hold for 10 min. The product peak was observed at 6.5 min. The mass spectra of the products are provided in the spectral data below.

### Heptafluoropropylation of Arenes

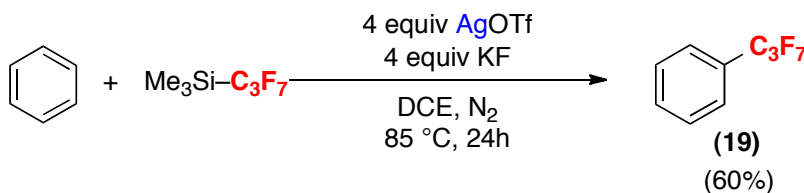

In a glovebox, AgOTf (83.2 mg, 0.324 mmol, 4 equiv) and KF (18.8 mg, 0.324 mmol, 4 equiv) were weighed into a 4 mL vial and dissolved in DCE (0.2 mL). Benzene (144  $\mu\text{L}$ , 1.62 mmol, 20 equiv) was added to the reaction mixture. The vial was removed from the glovebox. In the air, TMS $\text{C}_3\text{F}_7$  (16.4  $\mu\text{L}$ , 0.081 mmol, 1 equiv) was added, and the vial was sealed with a Teflon-lined cap. The reaction was heated at 85  $^\circ\text{C}$  for 24 h with exclusion of light. The resulting dark brown mixture was cooled to room temperature and diluted with DCE (1 mL). 4-Fluoroanisole (1 equiv) was added as an internal standard, and the reaction was analyzed by  $^{19}\text{F}$  NMR spectroscopy in DCE to determine the yield.  $^{19}\text{F}$  NMR analysis of the crude reaction mixture showed that heptafluoropropylbenzene was formed in 60%. The product was identified by comparison to literature  $^{19}\text{F}$  NMR data: observed  $\delta$  –80.4 ppm (t,  $J$  = 9.8 Hz, 3F), –111.8 ppm (q,  $J$  = 9.8 Hz, 2F), –126.6 ppm (s, 2F) in DCE; lit. –80.2 ppm (t,  $J$  = 9 Hz, 3F), –111.5 ppm (q,  $J$  = 9 Hz, 2F), –126.5 ppm (s, 2F) in  $\text{CDCl}_3$ .<sup>9</sup> The identity of the product was further confirmed by GCMS analysis, where the product peak was observed at 5.0 min. The mass spectrum of the product is provided in the spectral data below.

### Trifluoromethylation of C<sub>6</sub>H<sub>6</sub> under Light

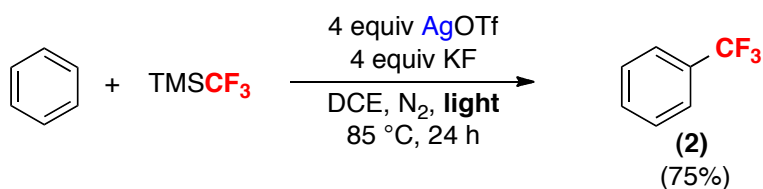

In a glovebox, AgOTf (83.2 mg, 0.324 mmol, 4 equiv) and KF (18.8 mg, 0.324 mmol, 4 equiv) were weighed into a 4 mL vial and dissolved in DCE (0.2 mL). Benzene (144  $\mu$ L, 1.62 mmol, 20 equiv) and TMSCF<sub>3</sub> (12  $\mu$ L, 0.081 mmol, 1 equiv) were added. The vial was sealed with a Teflon-lined cap and removed from the glovebox. A 26-watt fluorescent light source was placed 5 cm from the reaction, and the reaction was heated in a clear oil bath at 85 °C for 24 h. The resulting dark brown mixture was cooled to room temperature and diluted with DCE (1 mL). 4-Fluoroanisole (1 equiv) was added as an internal standard, and the reaction was analyzed by <sup>19</sup>F NMR spectroscopy, showing 75% yield of trifluorotoluene.

### Trifluoromethylation of C<sub>6</sub>H<sub>6</sub> Reaction with Additives

In a glovebox, AgOTf (83.2 mg, 0.324 mmol, 4 equiv) and KF (18.8 mg, 0.324 mmol, 4 equiv) were weighed into a 4 mL vial and dissolved in DCE (0.2 mL). Benzene (144  $\mu$ L, 1.62 mmol, 20 equiv), additive (0.2 equiv or 1 equiv), and TMSCF<sub>3</sub> (12  $\mu$ L, 0.081 mmol, 1 equiv) were added. The vial was sealed with a Teflon-lined cap and removed from the glovebox. The reaction was heated at 85 °C for 24 h with exclusion of light. The resulting dark brown mixture was cooled to room temperature and diluted with DCE (1 mL). 4-Fluoroanisole (1 equiv) was added as an internal standard, and the reaction was analyzed by <sup>19</sup>F NMR spectroscopy. The results of these experiments are reported in **Table S4**.

**Table S4.** Trifluoromethylation of C<sub>6</sub>H<sub>6</sub> with Additives

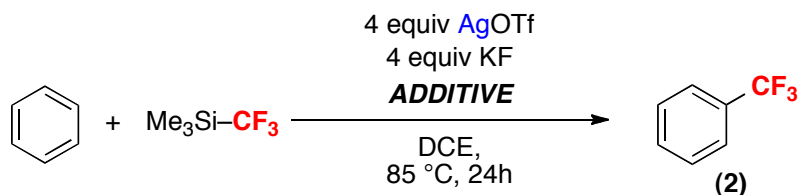

| entry | additive             | yield (%) |
|-------|----------------------|-----------|
| 1     | 20 mol % AIBN        | 77        |
| 2     | 1 equiv AIBN         | 57        |
| 3     | 1 equiv nitrobenzene | 85        |
| 4     | 1 equiv TEMPO        | 7         |

### Radical Trifluoromethylation

The radical trifluoromethylation reactions were performed following a literature procedure.<sup>10</sup> In air, anisole (109  $\mu$ L, 1.0 mmol) or veratrole (127  $\mu$ L, 1.0 mmol), DMSO (2.0 mL), a DMSO solution of H<sub>2</sub>SO<sub>4</sub> (0.5 M, 2.0 mL), a DMSO solution of CF<sub>3</sub>I (3.0 M, 1.0 mL) and an aqueous solution of FeSO<sub>4</sub> (1 M, 0.3 mL) were combined in a 20 mL vial. A 30% aqueous solution of H<sub>2</sub>O<sub>2</sub> (0.2 mL) was added drop-wise at the rate of 0.04 mL/min using a syringe pump. After the addition of H<sub>2</sub>O<sub>2</sub>, the mixture was stirred at 45 °C for 20 min. After cooling to room temperature, 2,2,2-trifluoroethanol (1 equiv) was added as an internal standard, and the reaction was analyzed by <sup>19</sup>F NMR spectroscopy. The results of these experiments are reported in **Table S5**.

This reaction was also heated to 85 °C for 20 min after the addition of H<sub>2</sub>O<sub>2</sub>. The result is shown at **Table S5**, entry 3.

**Table S5.** Radical Trifluoromethylation

| $  \begin{array}{c}  \text{R} \text{---} \text{C}_6\text{H}_5 + \text{CF}_3\text{I} \xrightarrow[\text{DMSO}]{\begin{array}{l} 0.3 \text{ equiv FeSO}_4 \\ 2 \text{ equiv H}_2\text{O}_2 \\ 1 \text{ equiv H}_2\text{SO}_4 \end{array}} \text{R} \text{---} \text{C}_6\text{H}_4\text{CF}_3 \\  \text{3 equiv}  \end{array}  $ |           |               |               |                                                                     |  |
|--------------------------------------------------------------------------------------------------------------------------------------------------------------------------------------------------------------------------------------------------------------------------------------------------------------------------------|-----------|---------------|---------------|---------------------------------------------------------------------|--|
| entry                                                                                                                                                                                                                                                                                                                          | substrate | major product | NMR yield (%) | isomer ration                                                       |  |
| 1                                                                                                                                                                                                                                                                                                                              |           |               | 26            | a : b : c = 7.5 : 1 : 5<br>( <b>14a</b> : <b>14b</b> : <b>14c</b> ) |  |
| 2                                                                                                                                                                                                                                                                                                                              |           |               | 60            | a : b = 9.8 : 1<br>( <b>7</b> : <b>8</b> )                          |  |
| 3 <sup>[a]</sup>                                                                                                                                                                                                                                                                                                               |           |               | 67            | a : b = 10.2 : 1<br>( <b>7</b> : <b>8</b> )                         |  |

<sup>[a]</sup> Reaction was heated at 85 °C.

### Radical Trifluoromethylation in DCE

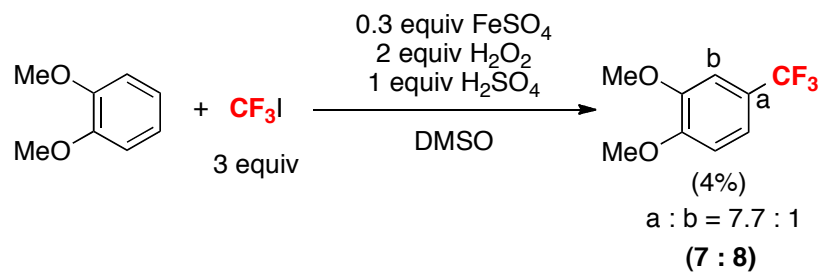

The radical trifluoromethylation reactions were performed following a modified literature procedure.<sup>10</sup> In air, veratrole (127  $\mu\text{L}$ , 1.0 mmol), DCE (2.0 mL), a DCE solution of  $\text{H}_2\text{SO}_4$  (0.5 M, 2.0 mL), a DMSO solution of  $\text{CF}_3\text{I}$  (3.0 M, 1.0 mL) and an aqueous solution of  $\text{FeSO}_4$  (1 M, 0.3 mL) were combined in a 20 mL vial. A 30% aqueous solution of  $\text{H}_2\text{O}_2$  (0.2 mL) was added drop-wise at the rate of 0.04 mL/min using a syringe pump. After the addition of  $\text{H}_2\text{O}_2$ , the mixture was stirred at 45  $^\circ\text{C}$  for 20 min. After cooling to room temperature, 2,2,2-trifluoroethanol (1 equiv) was added as an internal standard, and the reaction was analyzed by  $^{19}\text{F}$  NMR spectroscopy.

## References:

---

- <sup>1</sup> Tyrre, W. E.; Naumann, D. *J. Fluorine Chem.* **2004**, *125*, 823.
- <sup>2</sup> Chu, L.; Qing, F.-L. *Org. Lett.* **2010**, *12*, 5060.
- <sup>3</sup> DeCosta, D.; Pincock, J. *J. Org. Chem.* **2002**, *67*, 9484.
- <sup>4</sup> Stavber, S.; Zupan, M. *J. Org. Chem.* **1983**, *48*, 2223.
- <sup>5</sup> Chen, Q.-Y.; Li, Z.-T. *J. Chem. Soc., Perkin Trans. 1* **1993**, 645.
- <sup>6</sup> Naumann, D.; Kischkewitz, J. *J. Fluorine Chem.* **1990**, *46*, 265.
- <sup>7</sup> Cho, E. J.; Senecal, T. D.; Kinzel, T.; Zhang, Y.; Watson, D. A.; Buchwald, S. L. *Science* **2010**, *328*, 1679.
- <sup>8</sup> Ji, Y.; Brueckl, T.; Baxter, R. D.; Fujiwara, Y.; Seiple, I. B.; Su, S.; Blackmond, D. G.; Baran, P. S. *Proc. Nat. Acad. Sci.* **2011**, *108*, 14411.
- <sup>9</sup> Gerus, I. I.; Yagupol'skii, Yu. L.; Yagupol'skii, L. M. *Journal of Organic Chemistry USSR (English Translation)*, **1985**, *21*, 1694.
- <sup>10</sup> Kino, T.; Nagase, Y.; Ohtsuka, Y.; Yamamoto, K.; Uruguchi, D.; Tokuhisa, K.; Yamakawa, T. *J. Fluorine Chem.* **2010**, *131*, 98.

Sample Name:  
Data Collected on:  
Te. Chem. LSA UMICH.edu-vnmrs500  
Archive directory:

Sample directory:

FidFile:

Pulse Sequence: PROTON (s2pul)  
Solvent: cdcl3  
Data collected on: Apr 21 2011

Operator: yingdaye

Relax. delay 0.500 sec  
Pulse 45.0 degrees  
Acq. time 3.500 sec  
Width 8012.8 Hz  
S repetitions  
OBSERVE H1, 500.0931680 MHz  
DATA PROCESSING  
Line broadening 0.3 Hz  
FT size 65536  
Total time 0 min 40 sec

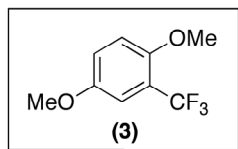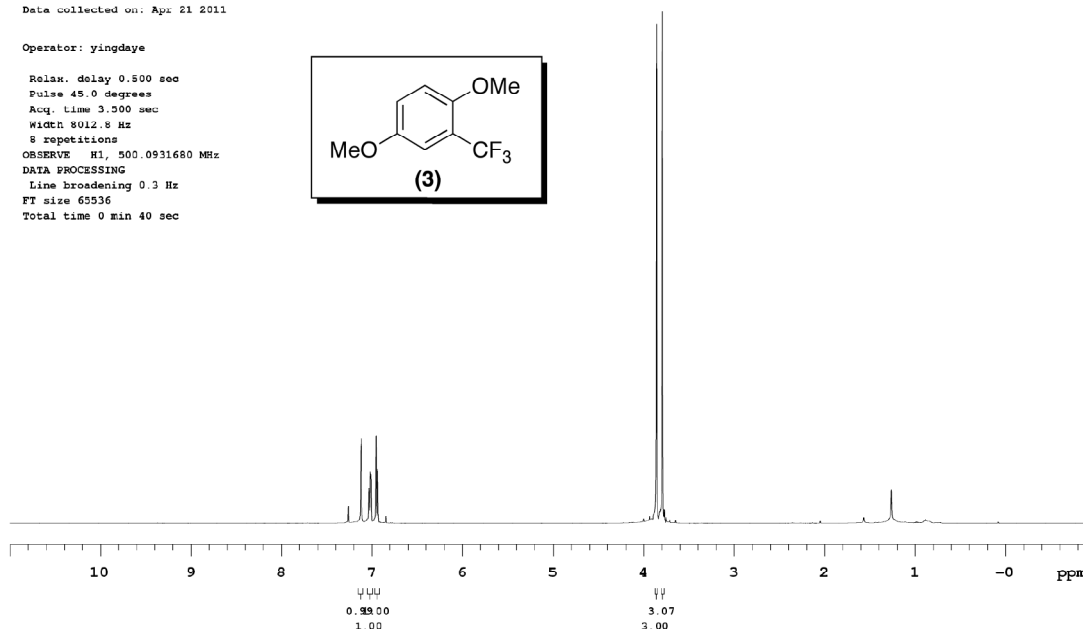

Sample Name:

Data Collected on:  
Te. Chem. LSA UMICH.edu-vnmrs500  
Archive directory:

Sample directory:

FidFile:

Pulse Sequence: CARBON (s2pul)  
Solvent: cdcl3  
Data collected on: Apr 21 2011

Operator: yingdaye

Relax. delay 0.100 sec  
Pulse 45.0 degrees  
Acq. time 2.045 sec  
Width 32051.3 Hz  
640 repetitions  
OBSERVE C13, 125.7485074 MHz  
DECOUPLE H1, 500.0956704 MHz  
power 42 dB  
continuously on  
WALTZ-16 modulated  
DATA PROCESSING  
Line broadening 1.0 Hz  
FT size 131072  
Total time 22 min

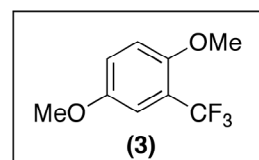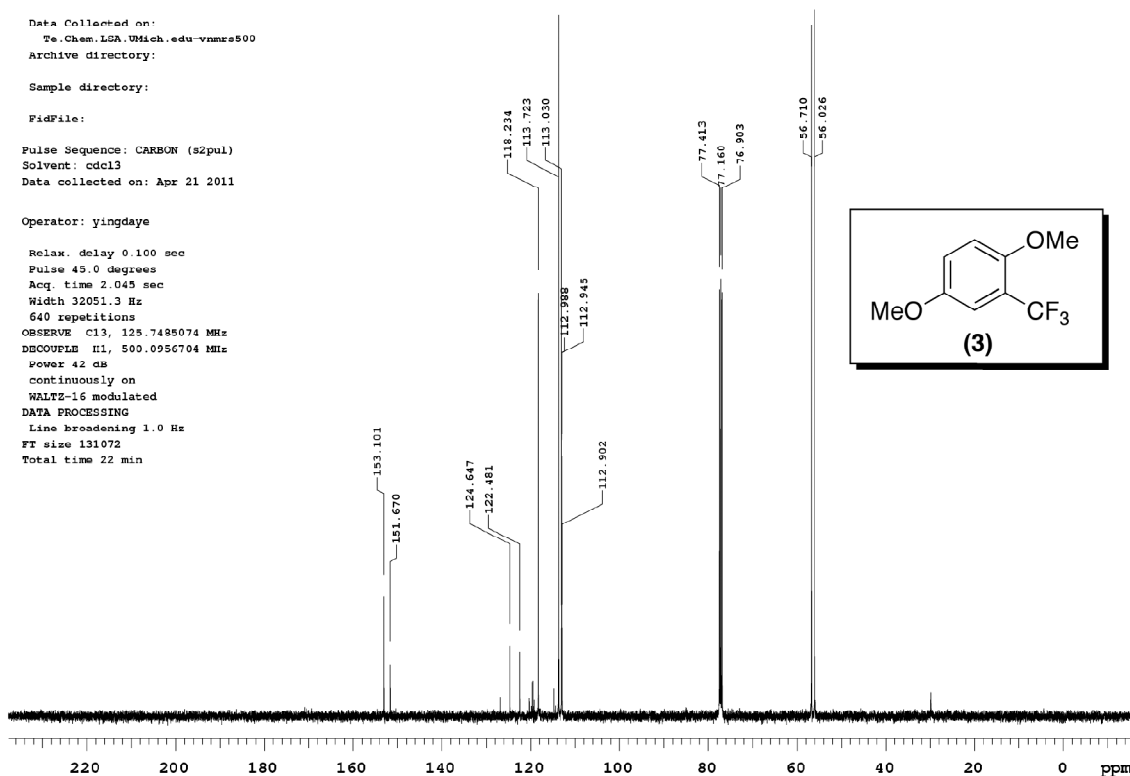

Sample Name:  
Data Collected on:  
Te.Chem.LSA.UMich.edu-vmms500  
Archive directory:

Sample directory:

FidFile

Pulse Sequence: FLUORINE (s2pul)  
Solvent: cdcl3  
Data collected on: Apr 21 2011

Operator: yingdaye

Relax. delay 1.000 sec  
Pulse 30.0 degrees  
Acq. time 0.603 sec  
Width 108.7 kHz  
16 repetitions  
OBSERVE F19, 470.5577223 MHz  
DATA PROCESSING  
Line broadening 1.5 Hz  
FT size 131072  
Total time 0 min 29 sec

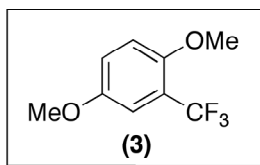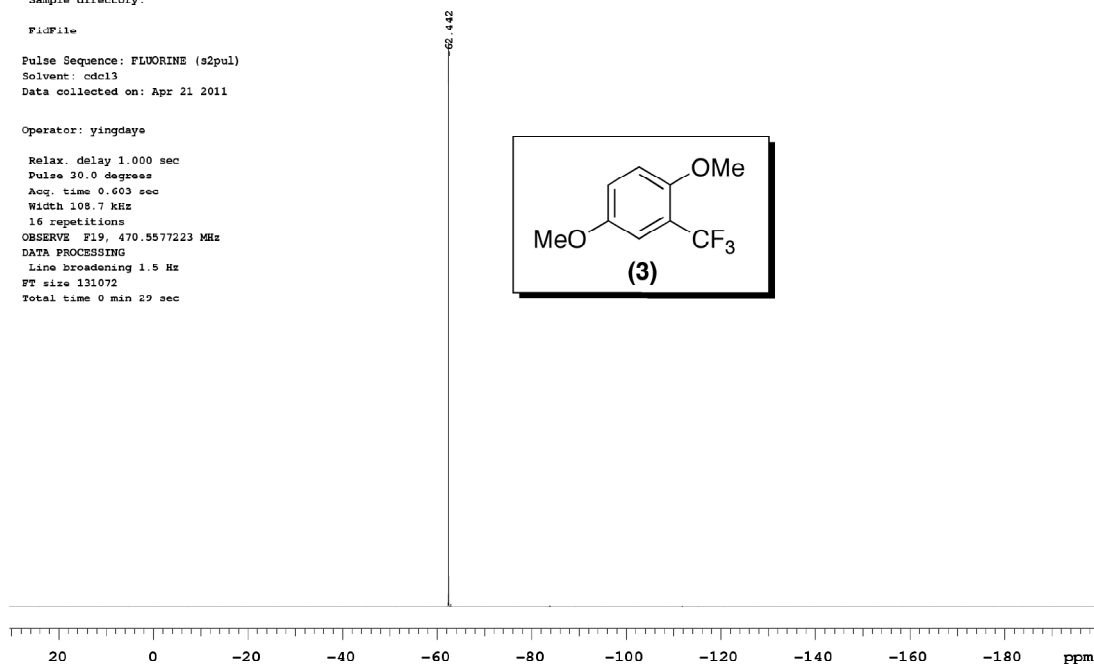

Sample Name:  
Data Collected on:  
Ga.Chem.LSA.UMich.edu-vmms400  
Archive directory:

Sample directory:

FidFile:

Pulse Sequence: PROTON (s2pul)  
Solvent: cdcl3  
Data collected on: Apr 21 2011

Operator: yingdaye

Relax. delay 0.500 sec  
Pulse 45.0 degrees  
Acq. time 3.500 sec  
Width 6410.3 Hz  
8 repetitions  
OBSERVE H1, 399.5334918 MHz  
DATA PROCESSING  
Line broadening 0.3 Hz  
FT size 65536  
Total time 0 min 40 sec

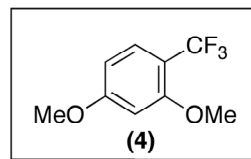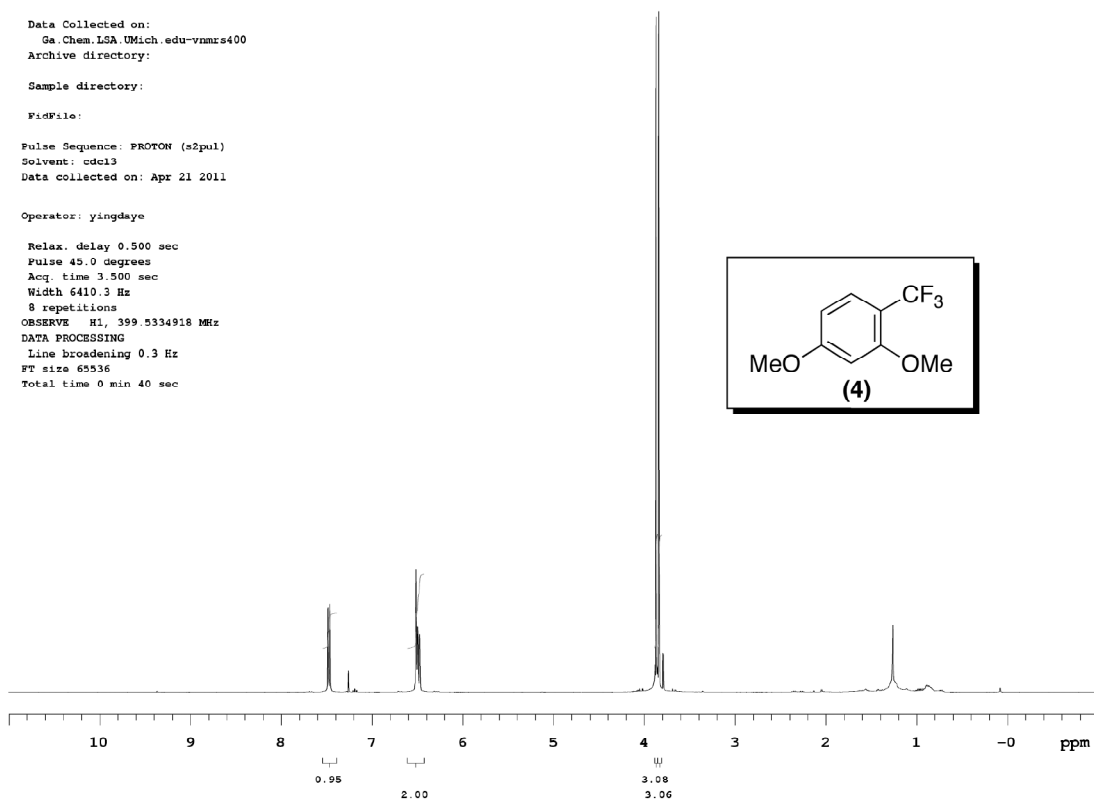

Sample Name:  
Data Collected on:  
Ga.Chem.LSA.UMich.edu-vmms400  
Archive directory:

Sample directory:

FidFile:

Pulse Sequence: CARBON (s2pul)  
Solvent: cdcl3  
Data collected on: Apr 21 2011

Operator: yingdays

Relax. delay 0.100 sec  
Pulse 45.0 degrees  
Acq. time 2.569 sec  
Width 25510.2 Hz  
524 repetitions  
OBSERVE C13, 100.627604 MHz  
DECOUPLE H1, 399.5354945 MHz  
Power 42 dB  
continuously on  
WALTZ-16 modulated  
DATA PROCESSING  
Line broadening 1.0 Hz  
FT size 131072  
Total time 27 min

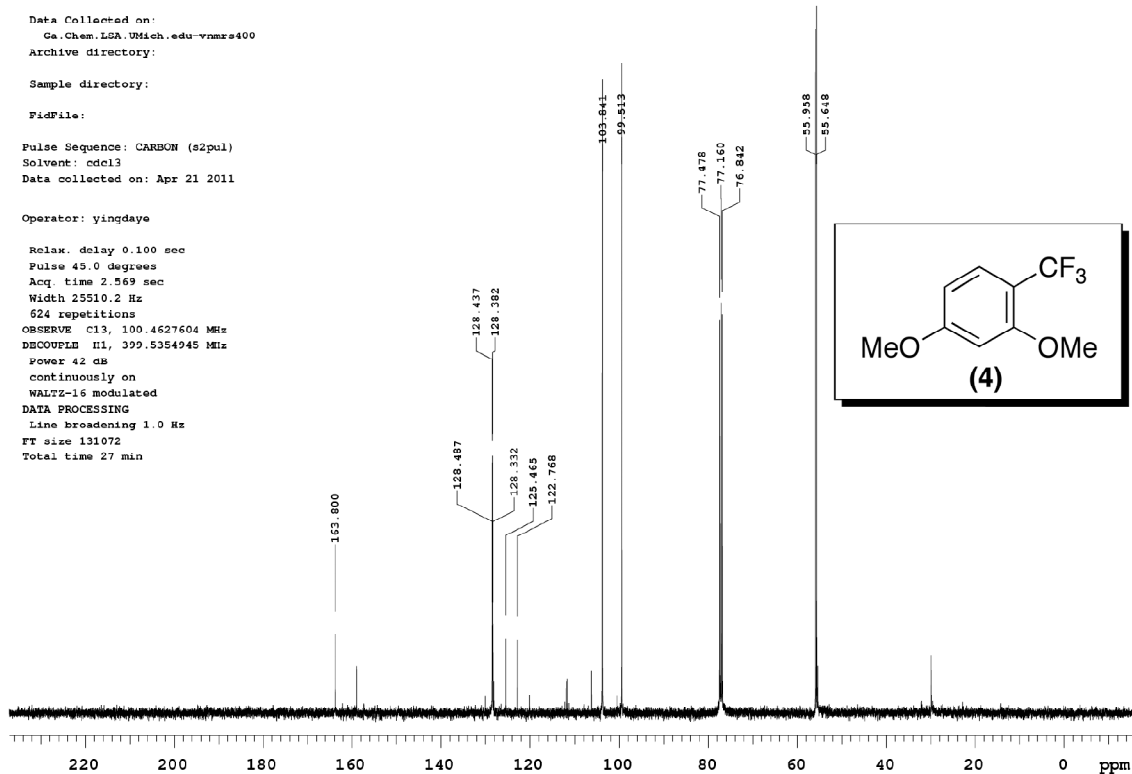

Sample Name:

Data Collected on:  
Ga.Chem.LSA.UMich.edu-vmms400  
Archive directory:

Sample directory:

FidFile:

Pulse Sequence: FIDORTNR (s2pul)  
Solvent: cdcl3  
Data collected on: Apr 21 2011

Operator: yingdays

Relax. delay 1.000 sec  
Pulse 30.0 degrees  
Acq. time 0.734 sec  
Width 89285.7 Hz  
16 repetitions  
OBSERVE F19, 375.9370924 MHz  
DATA PROCESSING  
Line broadening 0.5 Hz  
FT size 131072  
Total time 0 min 31 sec

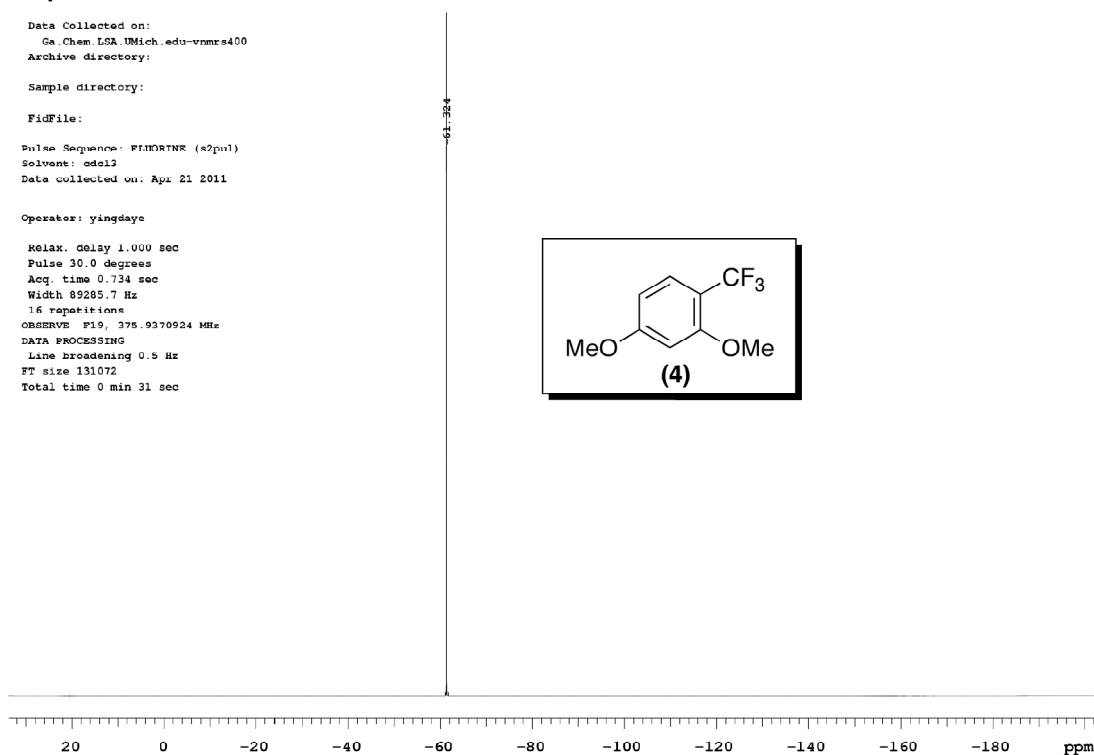

Sample Name:  
Data Collected on:  
Te.Chem.LSA.UMich.edu-vnmrs500  
Archive directory:  
Sample directory:  
FidFile:  
Pulse Sequence: PROTON (s2pul)  
Solvent: cdcl3  
Data collected on: Apr 27 2011

Temp. -10.0 C / 263.1 K  
Operator: yingdaye  
Relax. delay 0.500 sec  
Pulse 45.0 degrees  
Acq. time 3.500 sec  
Width 9012.9 Hz  
6 repetitions  
OBSERVE H1, 500.0931689 MHz  
DATA PROCESSING  
Line broadening 0.3 Hz  
FT size 65536  
Total time 0 min 40 sec

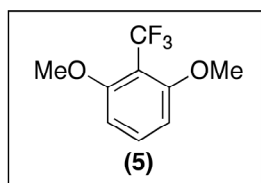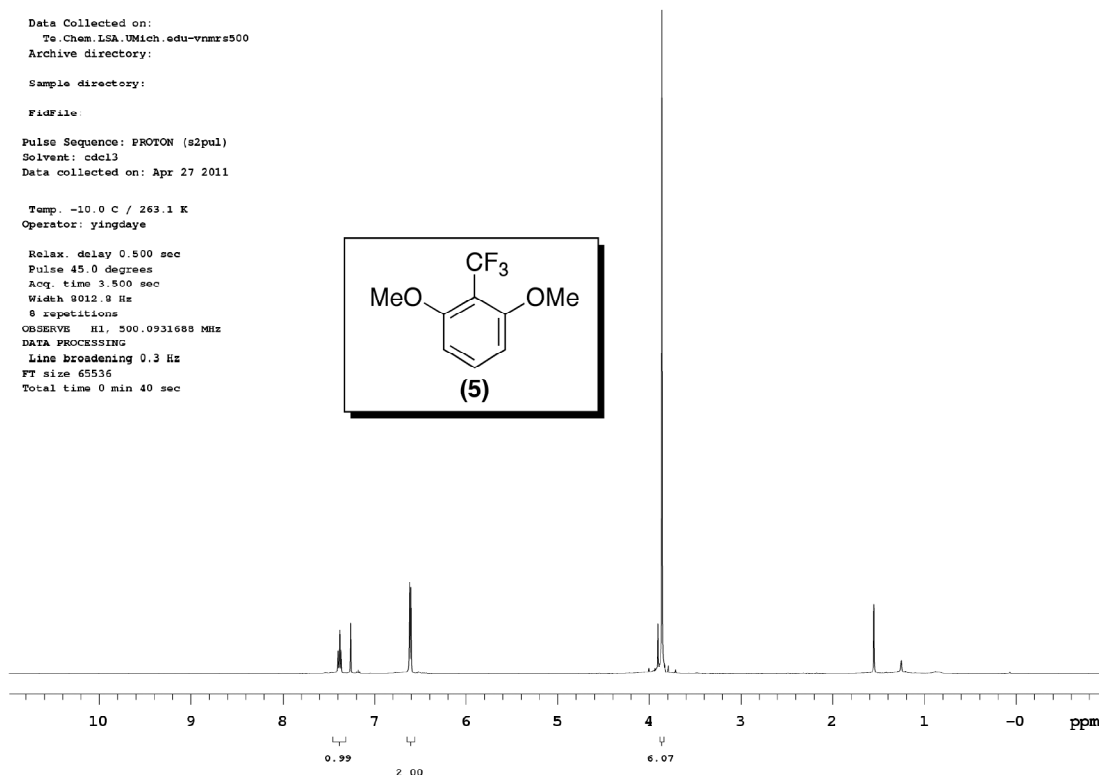

Sample Name:  
Data Collected on:  
Te.Chem.LSA.UMich.edu-vnmrs500  
Archive directory:  
Sample directory:  
FidFile:  
Pulse Sequence: CARBON (s2pul)  
Solvent: cdcl3  
Data collected on: Apr 27 2011

Temp. -10.0 C / 263.1 K  
Operator: yingdaye  
Relax. delay 0.100 sec  
Pulse 45.0 degrees  
Acq. time 2.045 sec  
Width 12051.3 Hz  
3472 repetitions  
OBSERVE C13, 125.7485070 MHz  
DECOUPLE H1, 500.0956704 MHz  
Power 42 dB  
continuously on  
WALTZ-16 modulated  
DATA PROCESSING  
Line broadening 1.0 Hz  
FT size 131072  
Total time 2 hr, 4 min

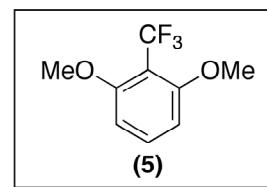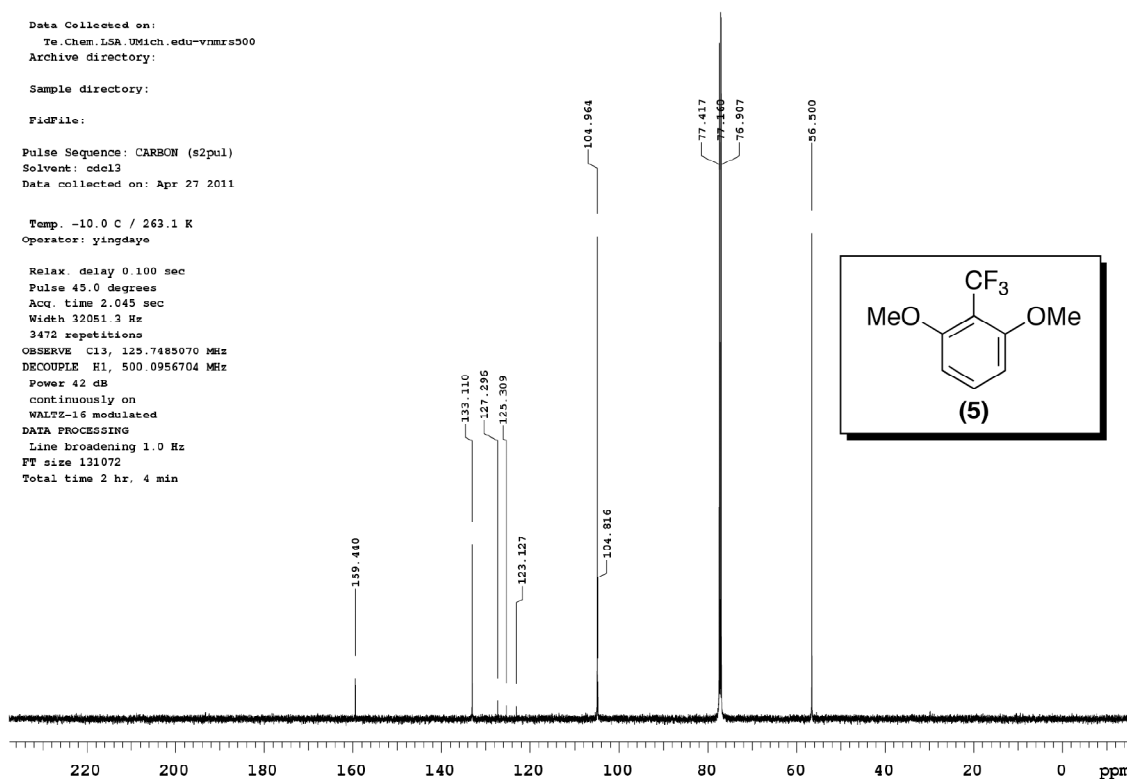

YY-4-2-6-dimethoxy-trifluorotoluene-F

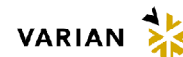

Sample Name:

Data Collected on:

To Chem.LSA.UMich.edu-vnmrs500

Archive directory:

Sample directory:

FidFile: YY-4-2-6-dimethoxy-trifluorotoluene-F

Pulse Sequence: FLUORINE (s2pul)

Solvent: cdcl3

Data collected on: Apr 27 2011

Temp. -10.0 C / 262.1 K

Operator: yingdaye

Relax. delay 1.000 sec

Pulse 30.0 degrees

Acq. time 0.603 sec

Width 108.7 kHz

16 repetitions

OBSERVE F19, 470.5577223 MHz

DATA PROCESSING

Line broadening 1.5 Hz

FT size 131072

Total time 0 min 29 sec

0.603

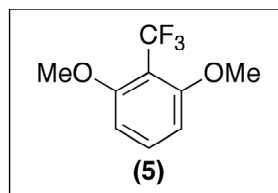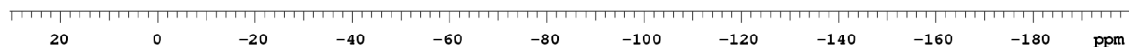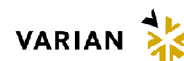

Sample Name:

Data Collected on:

Co.Chem.LSA.UMich.edu-vnmrs400

Archive directory:

Sample directory:

FidFile:

Pulse Sequence: PROTON (s2pul)

Solvent: cdcl3

Data collected on: May 12 2011

Temp. 30.0 C / 303.1 K

Operator: yingdaye

Relax. delay 0.500 sec

Pulse 45.0 degrees

Acq. time 3.500 sec

Width 6410.3 Hz

8 repetitions

OBSERVE H1, 400.5206314 MHz

DATA PROCESSING

Line broadening 0.3 Hz

FT size 65536

Total time 0 min 40 sec

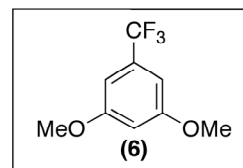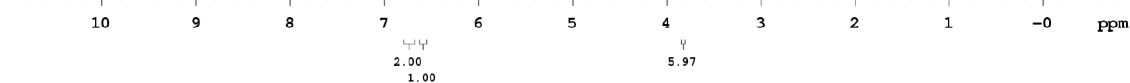

Sample Name:  
Data Collected on:  
Ga Chem LSA UMICH.edu-vnmrs400  
Archive directory:

Sample directory:

FidFile:

Pulse Sequence: CARBON (s2pul)  
Solvent: cdcl3  
Data collected on: May 12 2011

Temp. 25.0 C / 298.1 K  
Operator: yingdaye

Relax. delay 0.100 sec  
Pulse 45.0 degrees  
Acq. time 2.569 sec  
Width 25510.2 Hz  
864 repetitions  
OBSERVE C13, 100.4627593 MHz  
DECOUPLE H1, 399.5264945 MHz  
Power 42 dB  
continuously on  
WALTZ-16 modulated  
DATA PROCESSING  
Line broadening 1.0 Hz  
FT size 131072  
Total time 38 min

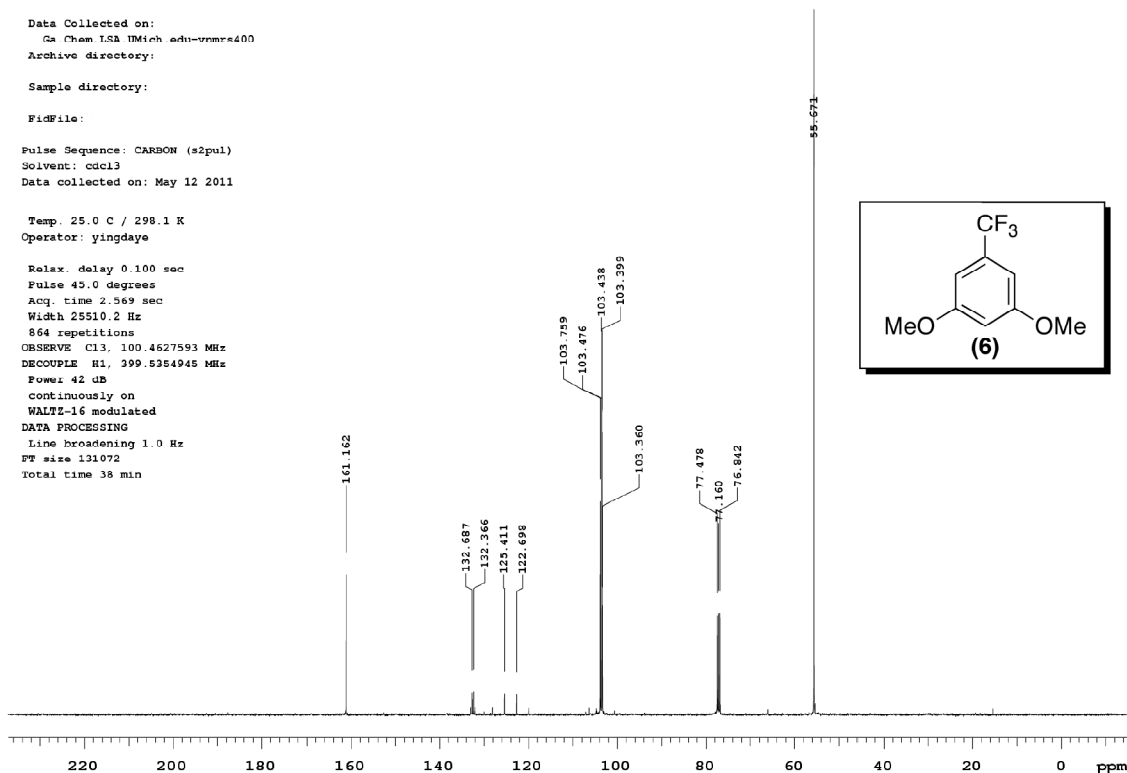

Sample Name:

Data Collected on:  
Co.Chem LSA UMICH.edu-vnmrs400  
Archive directory:

Sample directory:

FidFile:

Pulse Sequence: FLUORINE (s2pul)  
Solvent: cdcl3  
Data collected on: Apr 19 2011

Operator: yingdaye

Relax. delay 1.000 sec  
Pulse 30.0 degrees  
Acq. time 0.734 sec  
Width 89285.7 Hz  
16 repetitions  
OBSERVE F19, 376.8699339 MHz  
DATA PROCESSING  
Line broadening 1.5 Hz  
FT size 131072  
Total time 0 min 31 sec

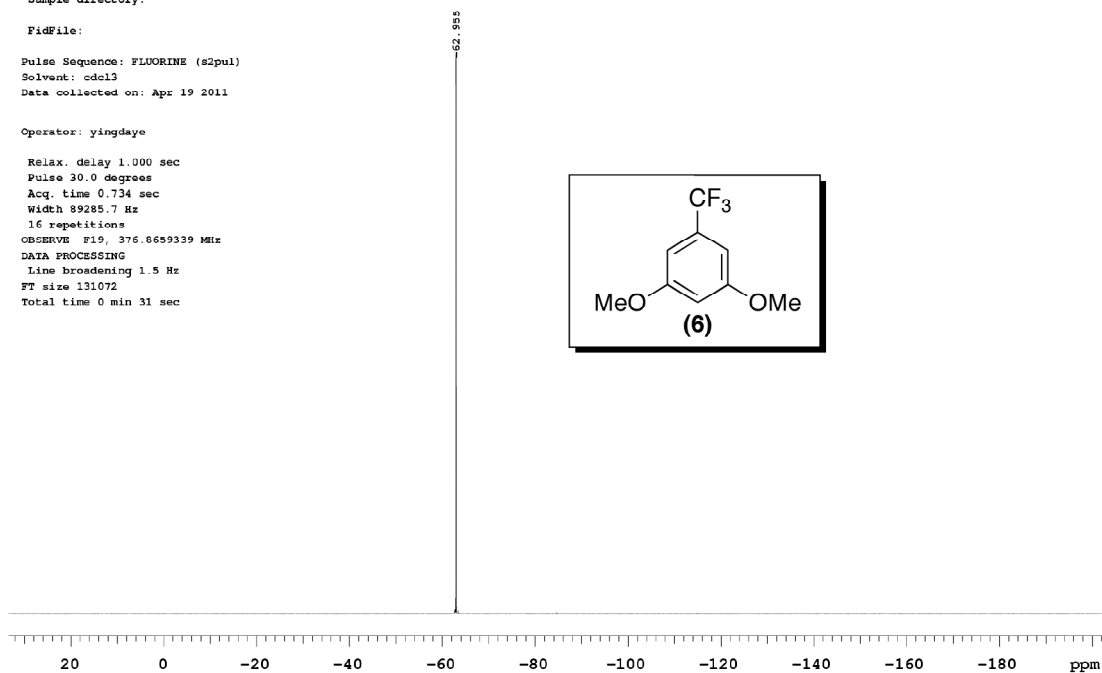

Sample Name:  
Data Collected on:  
Sn.Chem.LSA.UMich.edu-inova500  
Archive directory:  
Sample directory:  
FidFile:  
Pulse Sequence: PROTON (s2pul)  
Solvent: cdcl3  
Data collected on: Apr 27 2011  
Temp. 23.0 C / 296.1 K  
Operator: yingdaye  
Relax. delay 0.500 sec  
Pulse 45.0 degrees  
Acq. time 3.500 sec  
Width 7998.4 Hz  
8 repetitions  
OBSERVE H1, 499.9042601 MHz  
DATA PROCESSING  
Line broadening 0.3 Hz  
FT size 65536  
Total time 0 min 40 sec

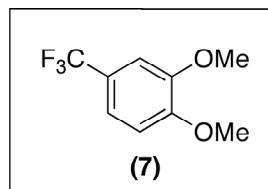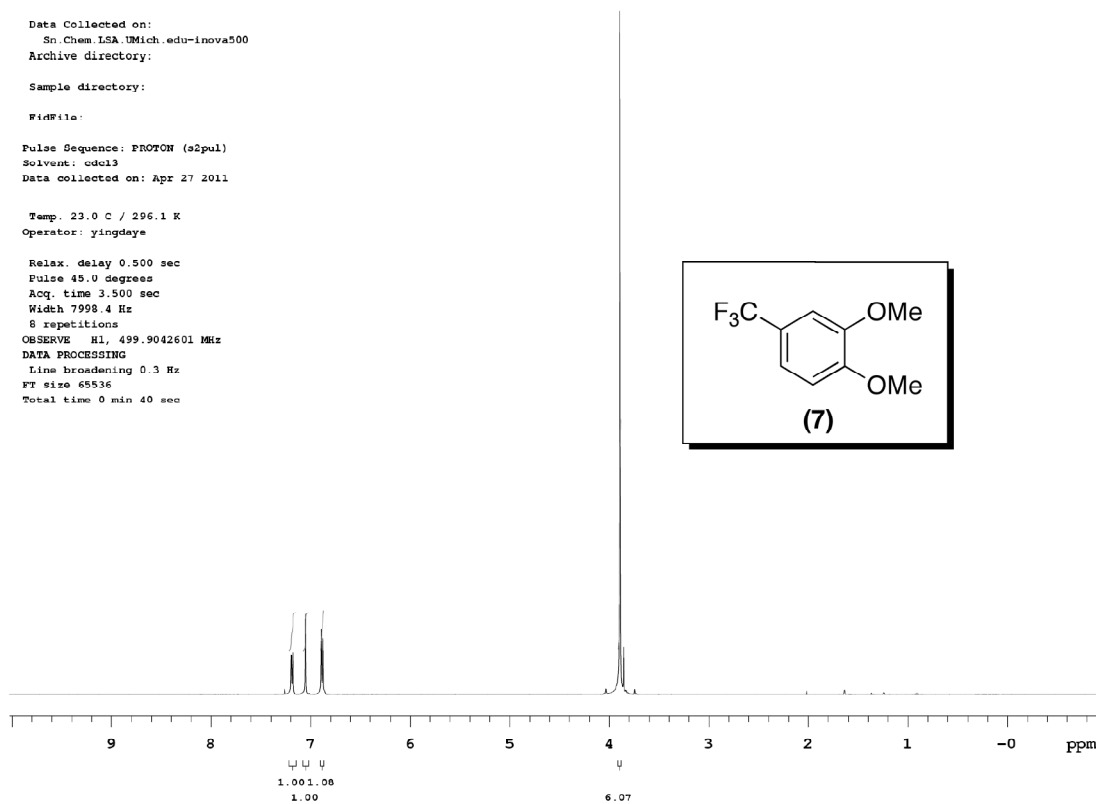

Sample Name:  
Data Collected on:  
Sn.Chem.LSA.UMich.edu-inova500  
Archive directory:  
Sample directory:  
FidFile:  
Pulse Sequence: CARBON (s2pul)  
Solvent: cdcl3  
Data collected on: Apr 27 2011  
Temp. 23.0 C / 296.1 K  
Operator: yingdaye  
Relax. delay 0.100 sec  
Pulse 45.0 degrees  
Acq. time 2.086 sec  
Width 31421.8 Hz  
576 repetitions  
OBSERVE C13, 125.7010125 MHz  
DECOUPLE H1, 499.9067532 MHz  
Power 32 dB  
continuously on  
WALTZ-16 modulated  
DATA PROCESSING  
Line broadening 1.0 Hz  
FT size 131072  
Total time 21 min

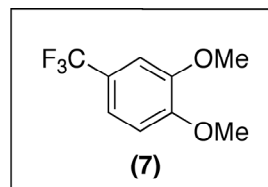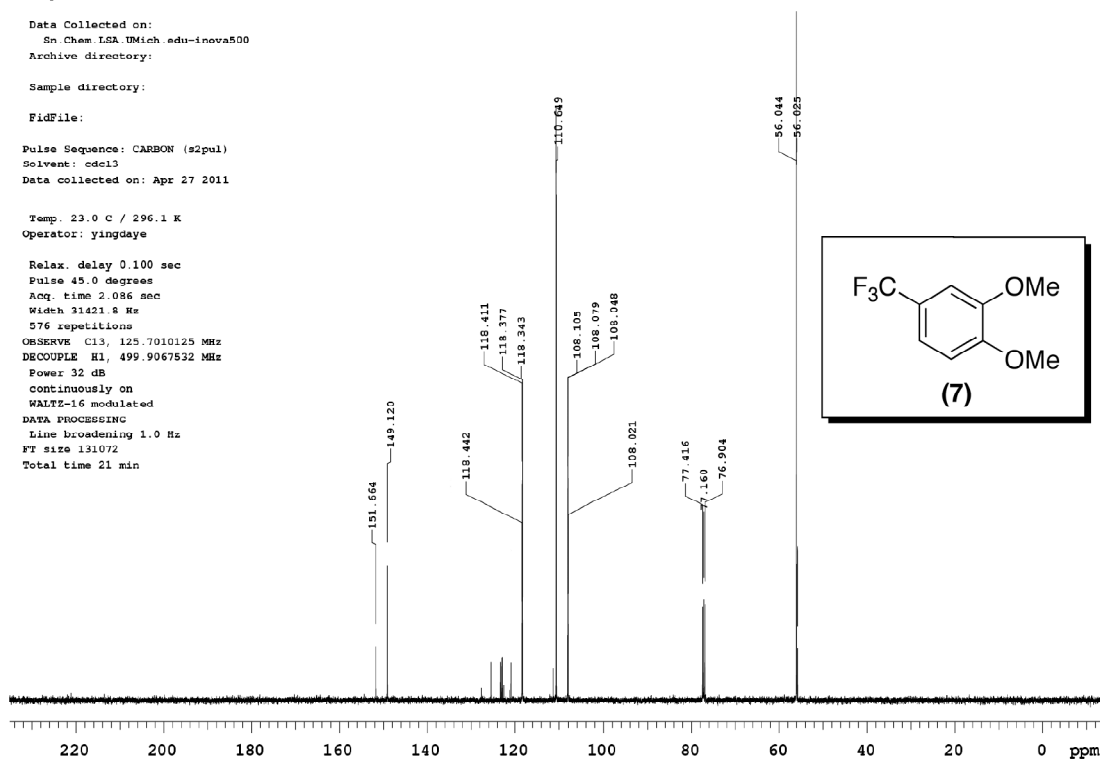

Sample Name:  
Data Collected on:  
Co. Chem. LSA, UMich. edu-vnmrs400  
Archive directory:

Sample directory:

FidFile:

Pulse Sequence: FLUORINE (s2pul)  
Solvent: cdcl3  
Data collected on: Apr 27 2011

Operator: yingdaye

Relax. delay 1.000 sec  
Pulse 30.0 degrees  
Acq. time 0.734 sec  
Width 89285.7 Hz  
16 repetitions  
OBSERVE F19, 376.8659339 MHz  
DATA PROCESSING  
Line broadening 1.5 Hz  
FT size 131072  
Total time 0 min 31 sec

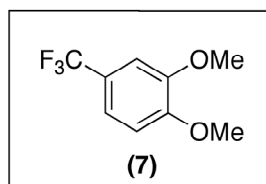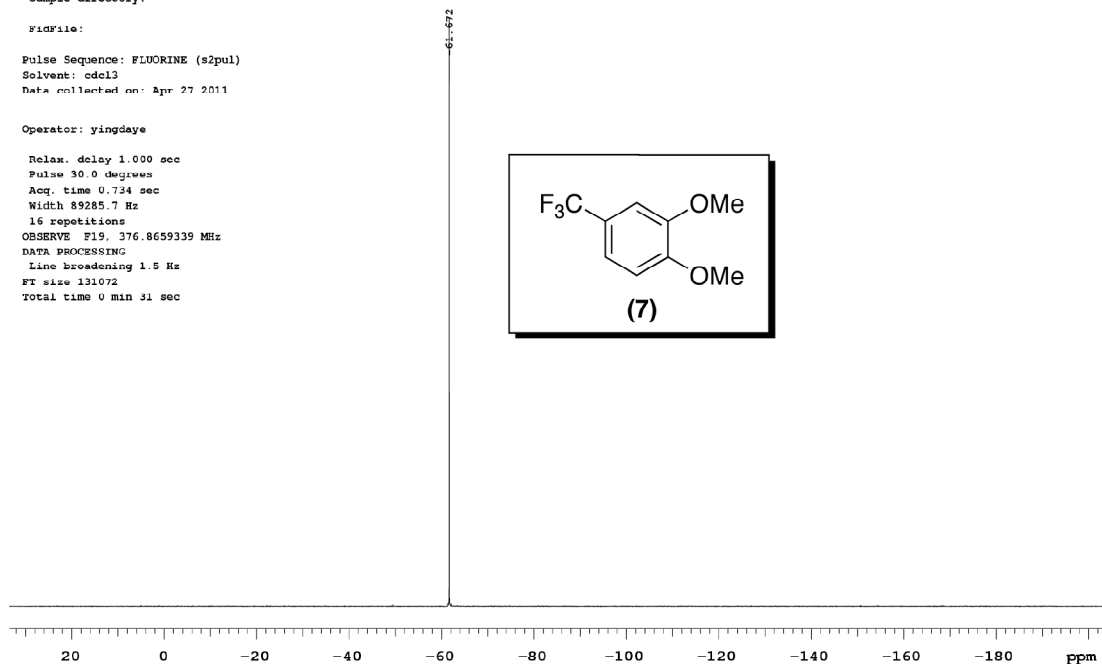

Sample Name:  
Data Collected on:  
Te. Chem. LSA, UMich. edu-vnmrs500  
Archive directory:

Sample directory:

FidFile:

Pulse Sequence: PROTON (s2pul)  
Solvent: cdcl3  
Data collected on: Apr 28 2011

Operator: yingdaye

Relax. delay 0.500 sec  
Pulse 45.0 degrees  
Acq. time 3.500 sec  
Width 8012.8 Hz  
0 repetitions  
OBSERVE H1, 500.0931692 MHz  
DATA PROCESSING  
Line broadening 0.3 Hz  
FT size 65536  
Total time 0 min 40 sec

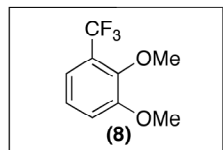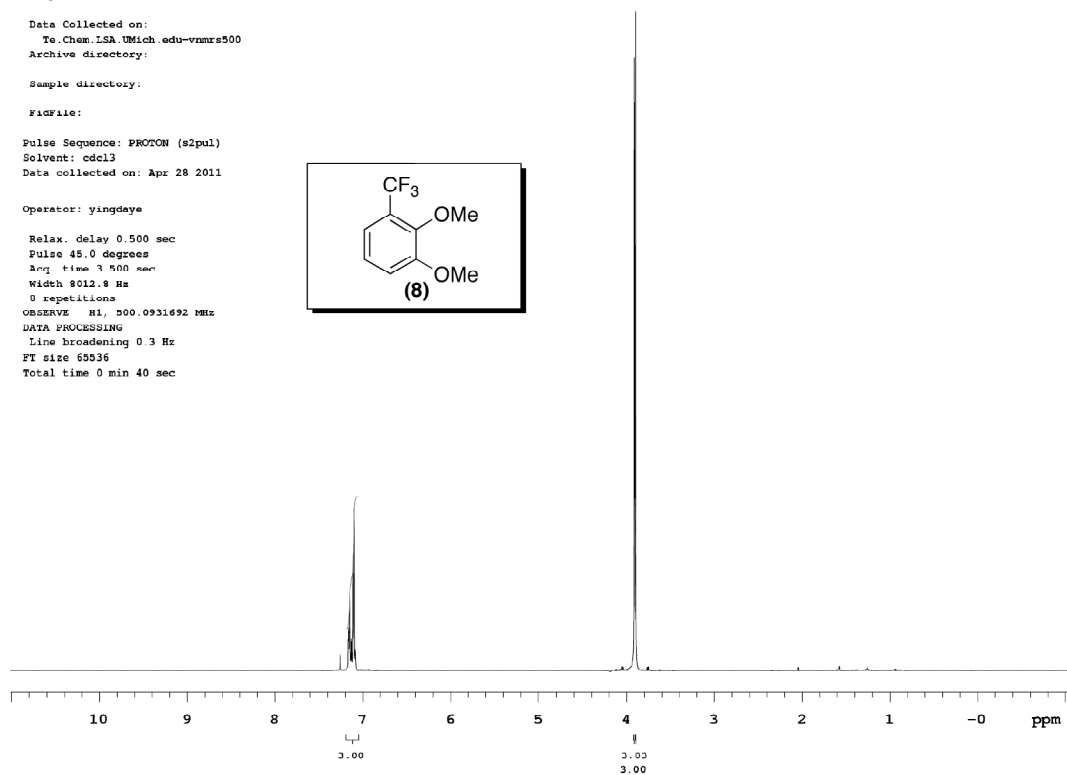

Sample Name:  
Data Collected on:  
Te.Chem.LSA.UNMich.edu-vnmrs500  
Archive directory:

Sample directory:

FidFile:

Pulse Sequence: CARBON (s2pul)  
Solvent: cdcl3  
Data collected on: Apr 20 2011

Operator: yingdaye

Relax. delay 0.100 sec  
Pulse 45.0 degrees  
Acq. time 2.045 sec  
Width 32051.3 Hz  
976 repetitions  
OBSERVE C13, 125.7485079 MHz  
DECOUPLE H1, 500.0956704 MHz  
Power 42 dB  
continuously on  
WALTZ-16 modulated  
DATA PROCESSING  
Line broadening 1.0 Hz  
FT size 131072  
Total time 35 min

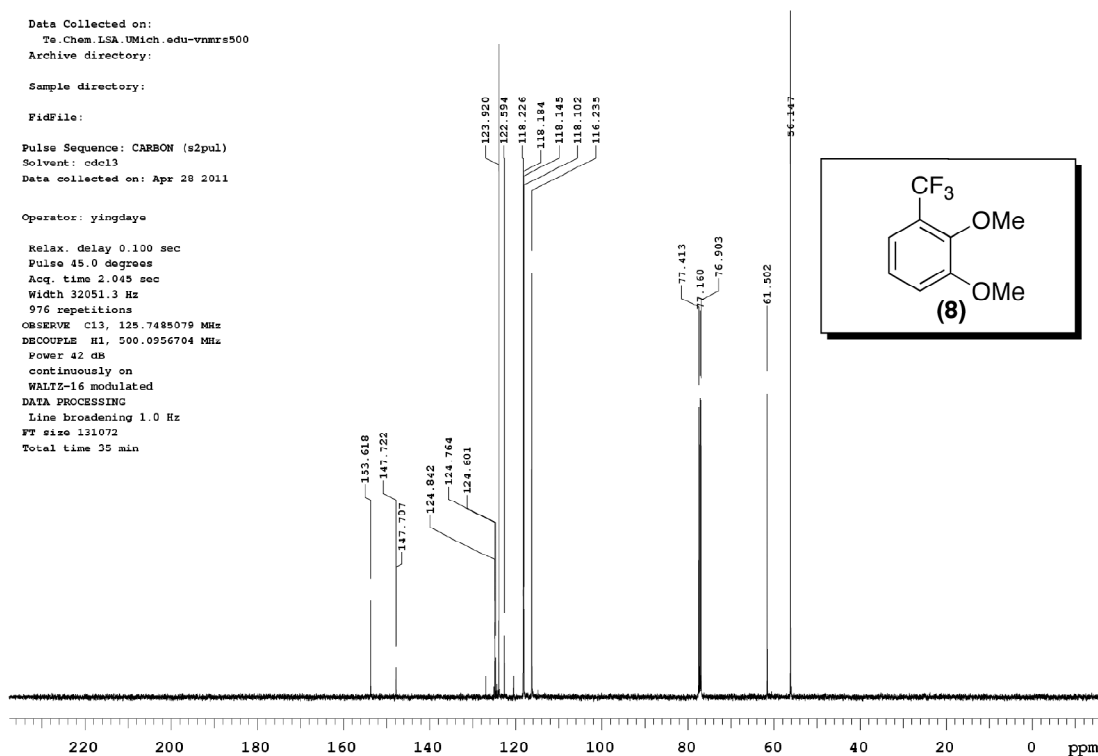

Sample Name:

Data Collected on:  
On Chem.LSA.UNMich.edu-vnmrs400  
Archive directory:

Sample directory:

FidFile:

Pulse Sequence: FLUORINE (s2pul)  
Solvent: cdcl3  
Data collected on: Apr 28 2011

Temp. 25.0 C / 298.1 K  
Operator: yingdaye

Relax. delay 1.000 sec  
Pulse 30.0 degrees  
Acq. time 0.734 sec  
Width 89285.7 Hz  
16 repetitions  
OBSERVE F19, 376.8659339 MHz  
DATA PROCESSING  
Line broadening 1.5 Hz  
FT size 131072  
Total time 0 min 31 sec

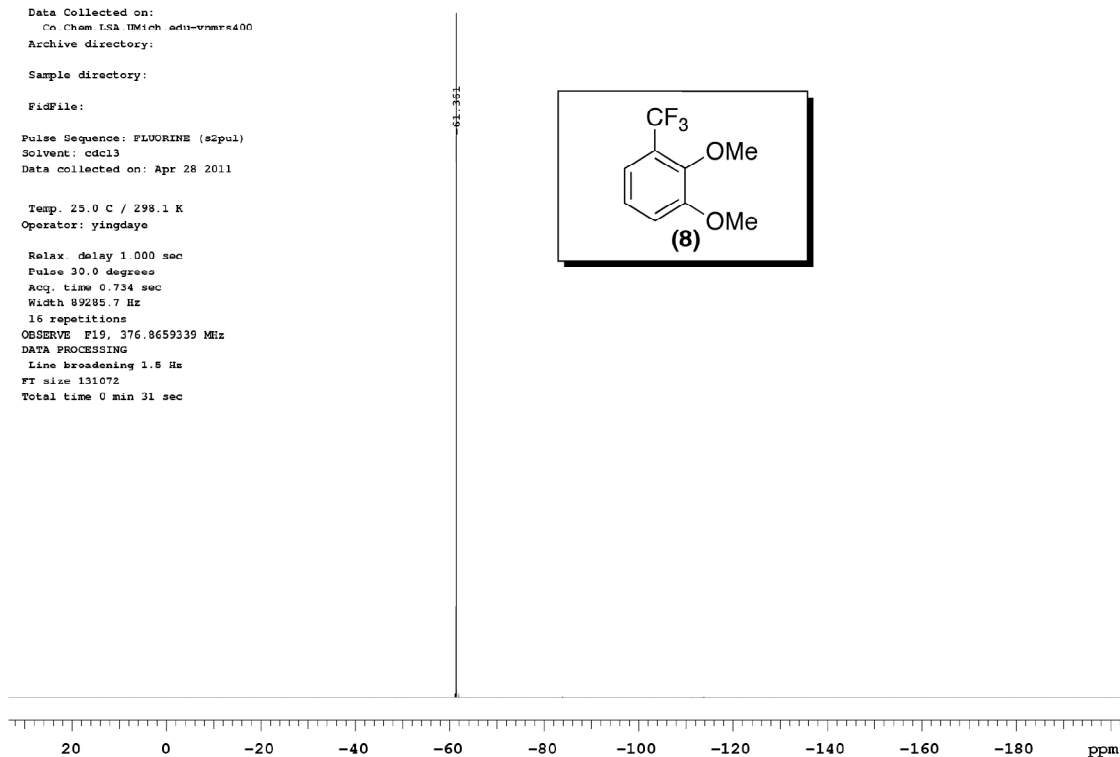

## GCMS Data for Trifluoromethylation Reactions

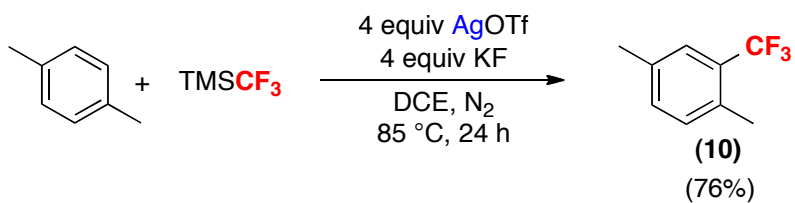

Retention time: 11.8 min

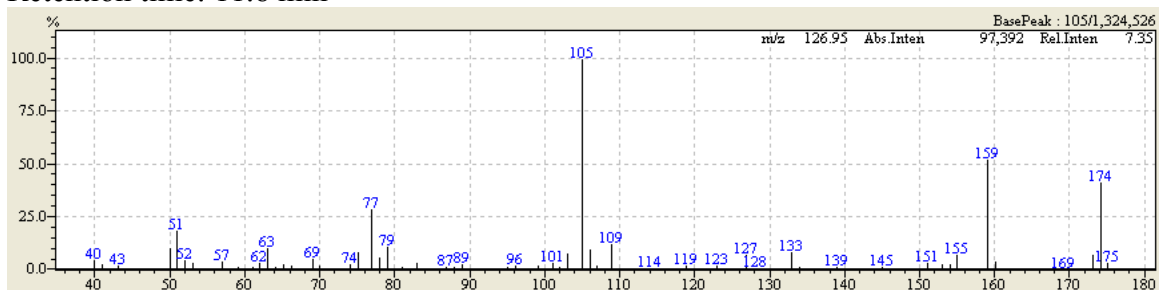

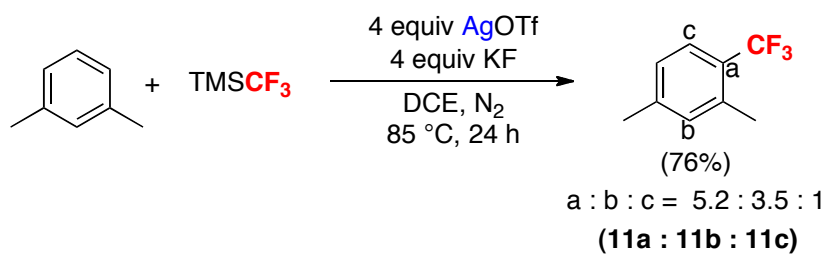

Retention time: 11.6 min

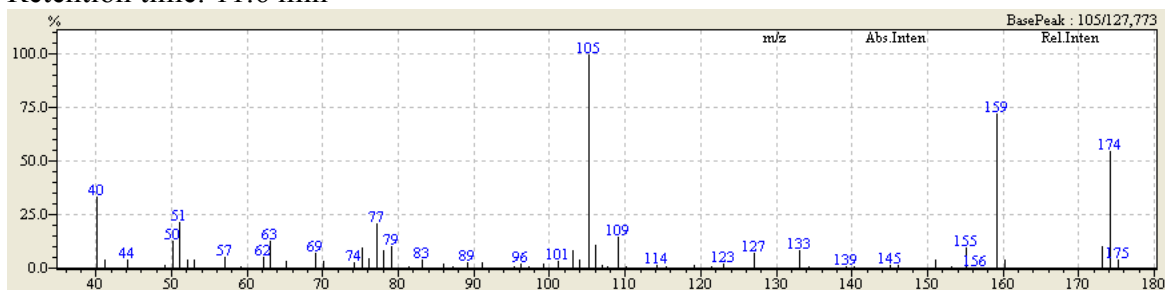

Retention time: 11.9 min

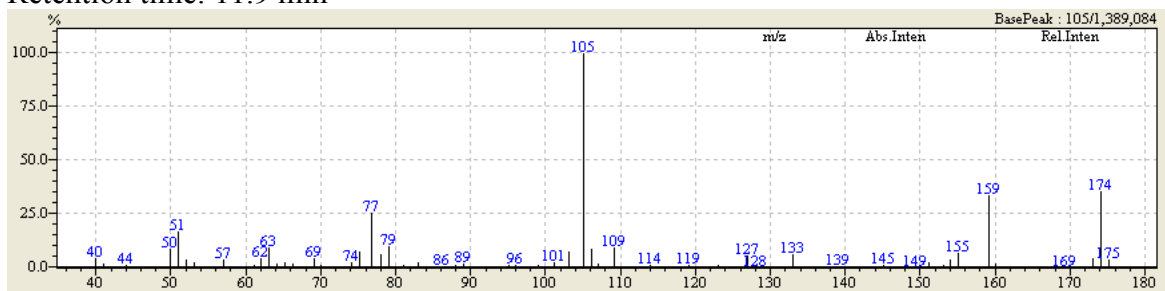

Retention time: 12.2 min

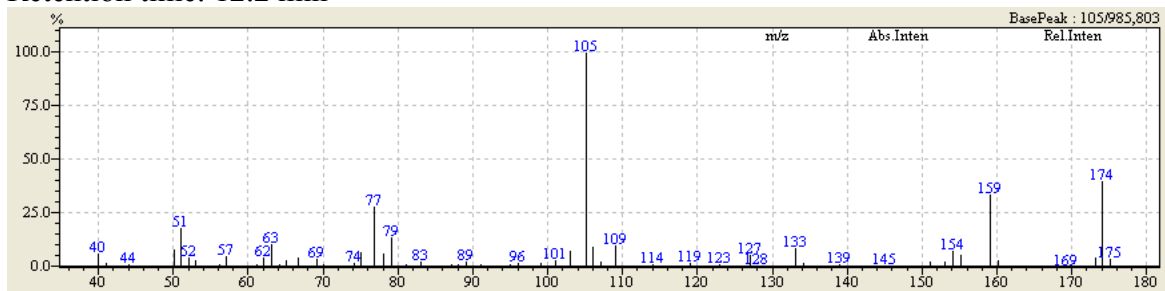

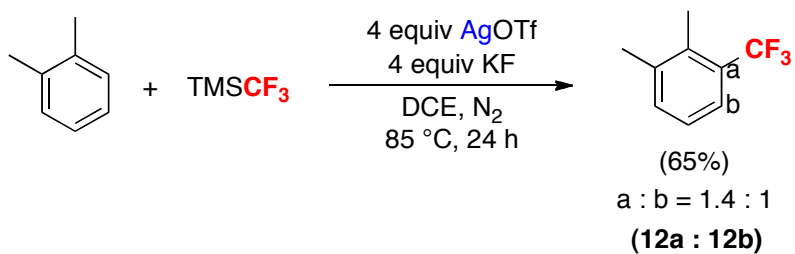

Retention time: 12.3 min

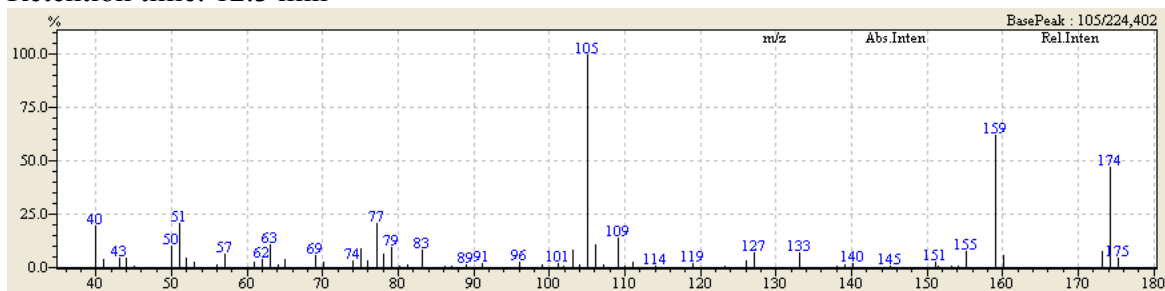

Retention time: 12.4 min

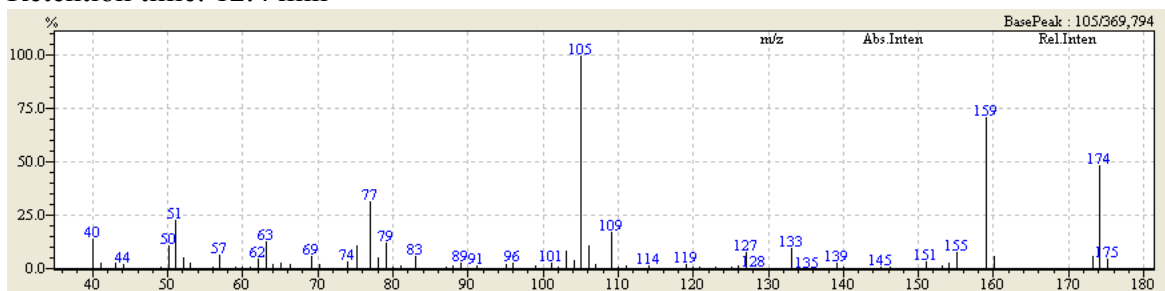

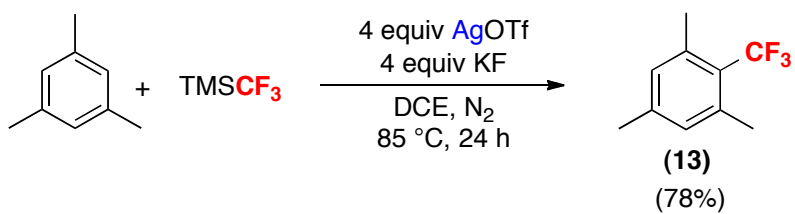

Retention time: 14.0 min

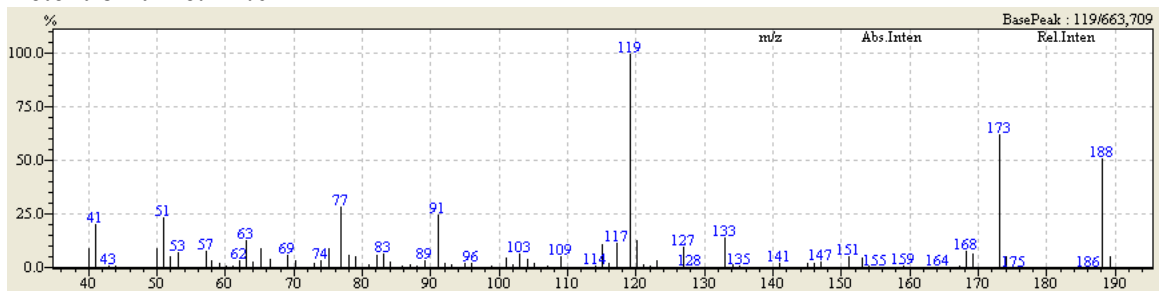

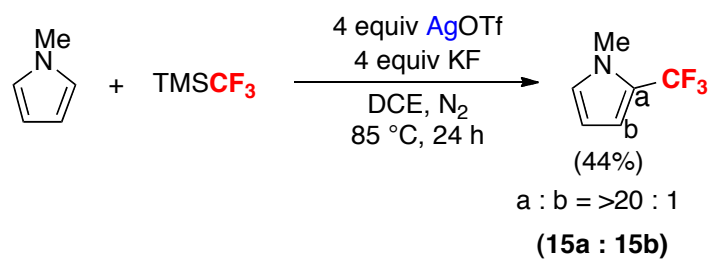

Retention time: 3.7 min

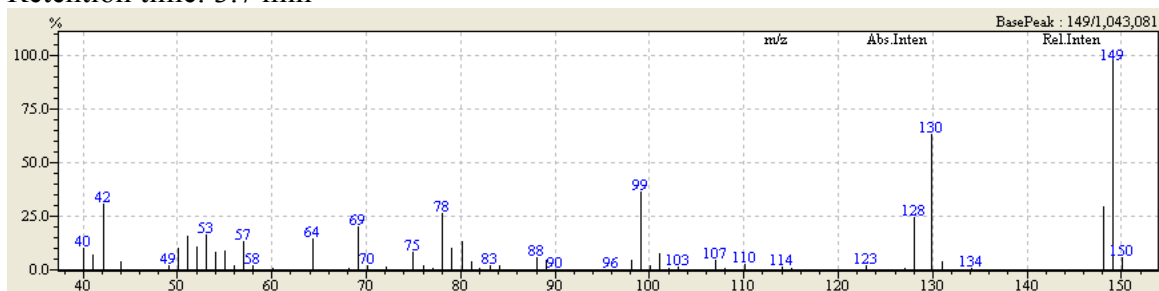

Retention time: 4.1 min

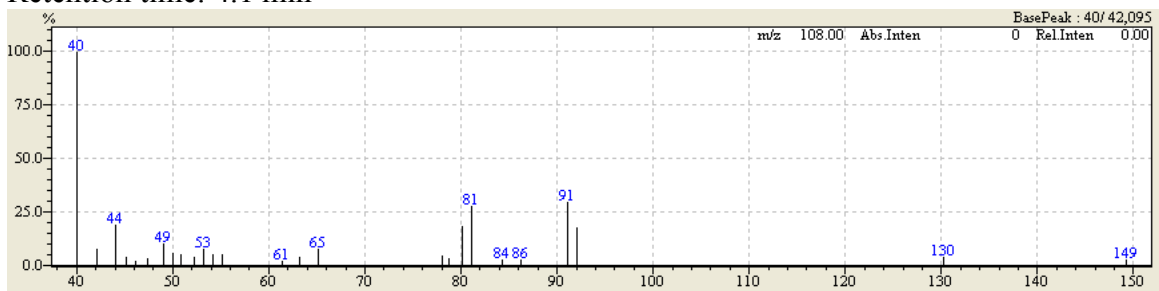

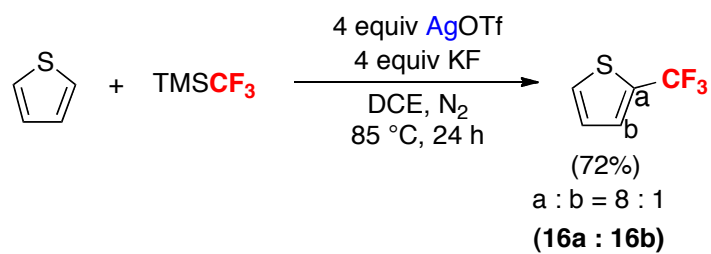

Retention time: 3.3 min

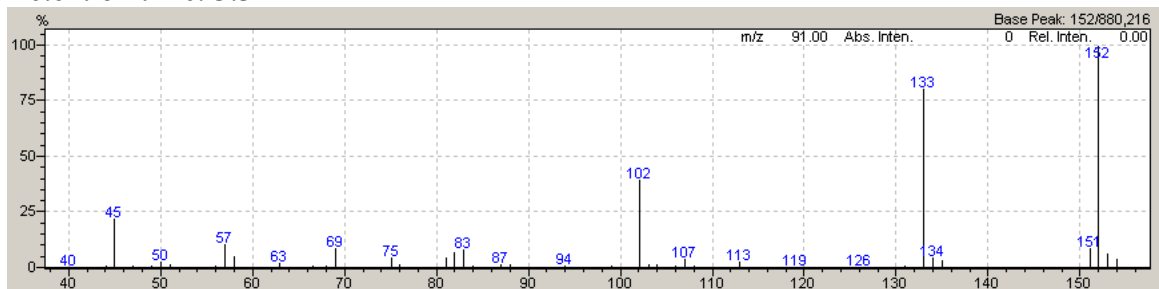

Retention time 3.5 min

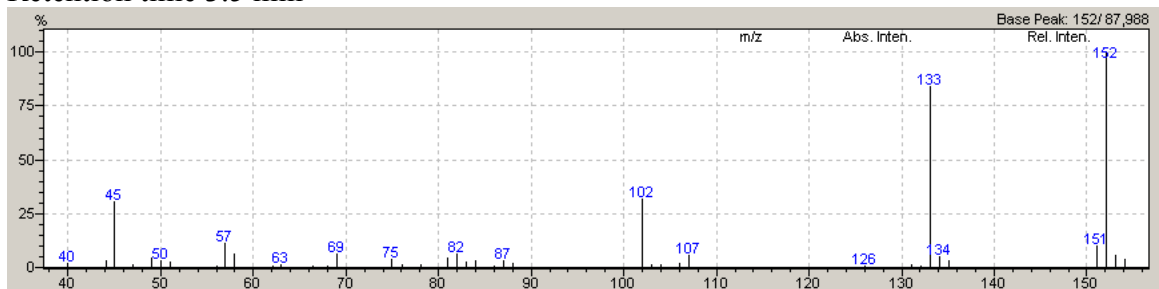

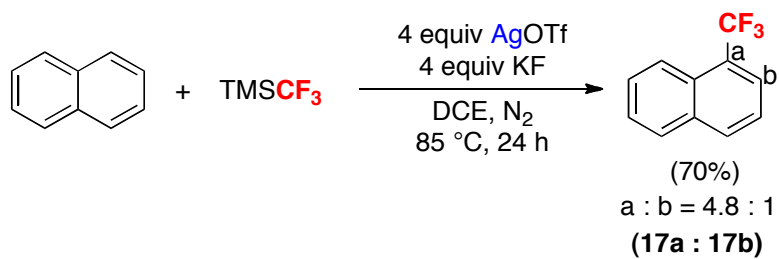

Retention time: 15.7 min

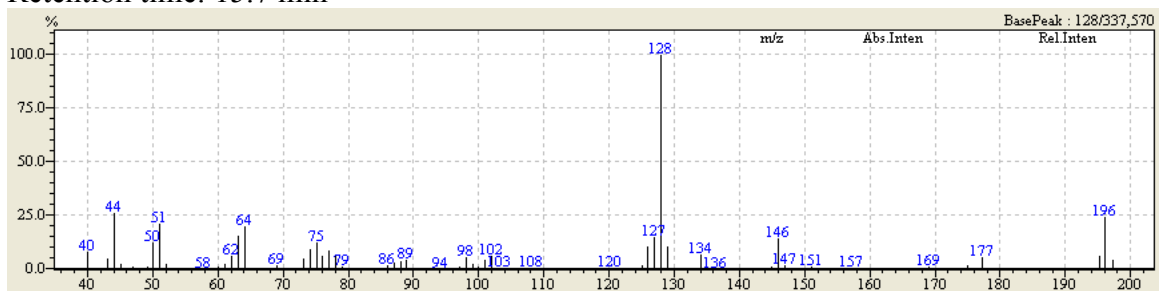

Retention time: 15.8 min

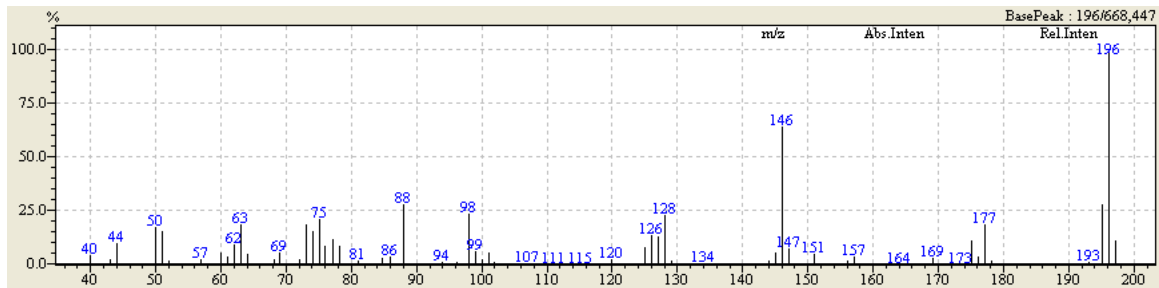

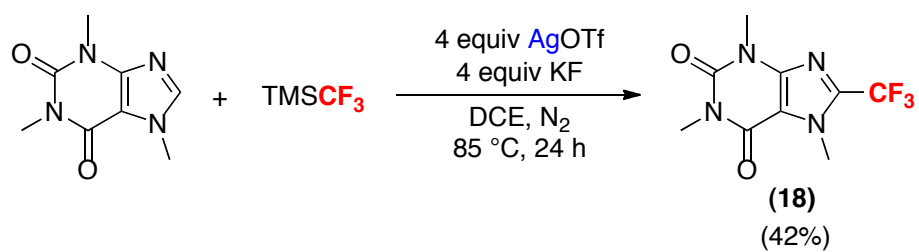

Retention time: 6.5 min

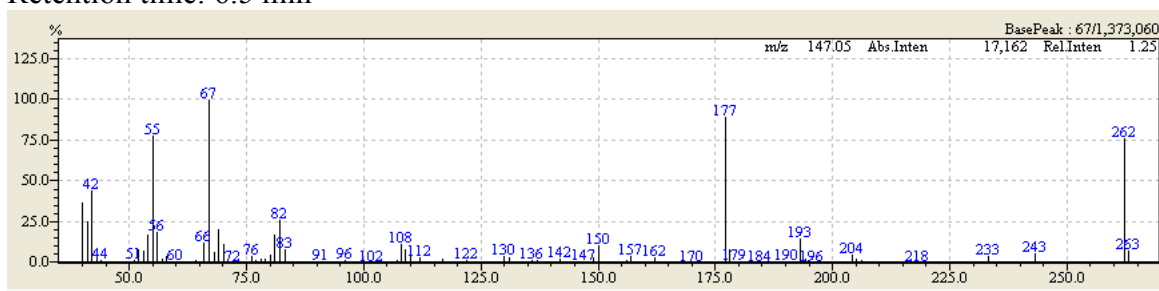

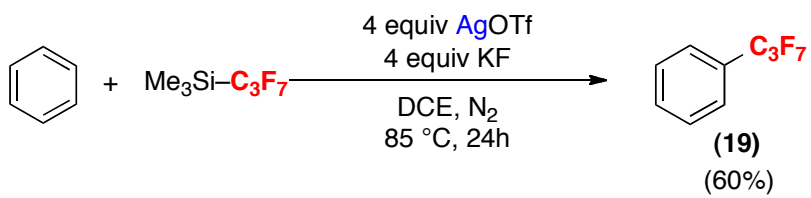

Retention time: 5.0 min

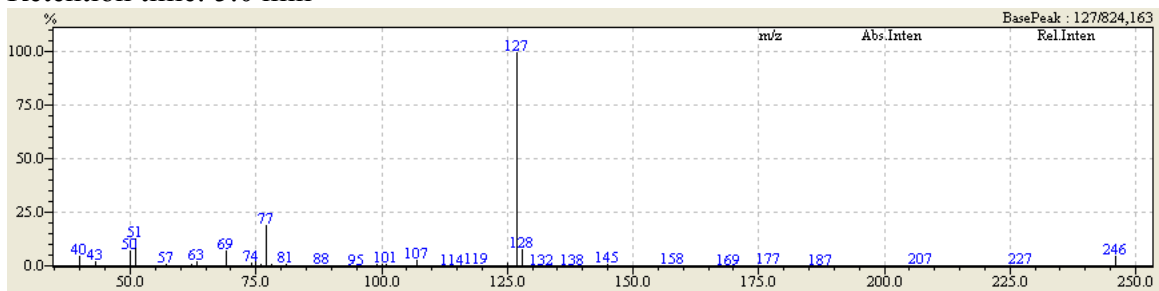

Supplement: NIHMS326509-supplement-1_si_001.pdf [file NIHMS326509-supplement-1_si_001.pdf]
